# Supplementary material for: Specific lexico-semantic predictions are associated with unique spatial and temporal patterns of neural activity
Source: eLife. 2018 Dec 21;7:e39061. doi: 10.7554/eLife.39061 (PMC6322859; doi:10.7554/eLife.39061)
Supplement: Figure 1—source data 1. — The first tab shows the full list of the stimuli, the second tab shows a subset of sentence pairs for the control analysis. [file elife-39061-fig1-data1.xlsx]

## Sheet: allPairs
ID	Context 1	SFW-1	context_length	Nr_clauses	dependency	Nr_strokes	freq (LOGW)	cloze_SFW-1	syn_class	syn_class	cloze_SFW	ID	Context 2	SFW-1	context_length	Nr_clauses	dependency	Nr_strokes	freq (LOGW)	cloze_SFW-1	syn_class	syn_class	cloze_SFW		expected_SFW	unexpected_SFW	question	answer
1	为了/防止/牛奶/变质，/妈妈/把/牛奶/放进了/xx	放进了	8	2	1	17	0.660275	0.2	1	verb	1	1	为了/让/食物/保鲜，/小瑞家/新买了/一台/xx	一台	7	2	1	6	1.21778	0.0666667	0	classififer	1		冰箱	冰柜	牛奶已经变质了。	wrong
1	In order to avoid the milk from going bad, mum put it in the xx.	put in										1	In order to keep the food fresh, the family bought a new xx.	a											fridge	freezer	The milk has gone bad.	wrong
2	起床后，/为了/能够/更好/采光，/他/立刻/拉开了/厚重的/xx	厚重的	9	3	1	26	0.305601	0	1	adj	1	2	人们/晚上/睡觉的/时候/一般/都会/拉上/卧室的/xx	卧室的	8	2	1	25	0.98284	0	1	adj	1		窗帘	帘子	窗帘一直没有被拉开。	wrong
2	After getting up, in order to have better lighting, he immediately opened the thick xx.	thick										2	When sleeping at night, people will generally close the xx of the bedroom.	bedroon											curtain	curtain	The curtain remains closed.	wrong
3	这栋楼/超过了/五层，/需要/安装/xx	安装	5	2	1	18	1.42727	0.4	1	verb	1	3	地震/撤离的/时候/要走/楼梯，/不要/乘坐/xx	乘坐	7	3	1	17	0.863497	0.133333	1	verb	1		电梯	直梯	这栋楼只有两层。	wrong
3	Since the building has more than five floors, they should install an xx.	install										3	When there is an earthquake, evacuate the building by taking the stairs, not the xx.	take											elevator	elevator	There are only two floors in this building.	wrong
4	老师/想在/黑板上/写字，/却/找不到/xx	找不到	6	2	1	19	0	0.0666667	1	verb	1	4	为了/制作/黑板报，/小罗/跟/老师/要了/一些/彩色的/xx	彩色的	9	3	1	25	1.17934	0	1	adj	1		粉笔	炭笔	老师今天没有去上课。	wrong
4	The teacher wants to write on the blackboard, but cannot find the xx.	cannot find										4	In order to make blackboard newspaper, Xiao Luo asked his teacher for some colorful xx.	colorful											chalk	charcoal	The teacher didn't go to the class today.	wrong
5	这项/新技术/用来/吸附/微小/颗粒，/净化/室内/xx	室内	8	2	1	13	1.39568	0.133333	1	adj	1	5	小陆/在/森林里/大口地/呼吸着/新鲜的/xx	新鲜的	6	2	1	35	1.26257	0.333333	1	adj	1		空气	气体	这项技术可以净水。	wrong
5	This new technology is used to absorb tiny particles, which purifies the indoor xx.	indoor										5	In the forest, Xiao Lu opened his mouth wide to breathe in the fresh xx.	fresh											air	gas	This technique can purify water.	wrong
6	中国/家庭/在餐桌上/经常/使用/木质/或者/竹质的/xx	竹质的	8	2	1	22	0	0.133333	1	adj	1	6	为了/环保，/大家/最好/尽量/不要/使用/一次性/xx	一次性	8	3	1	15	0.780041	0.533333	1	adj	1		筷子	公筷
6	In Chinese households, on the table there are often wooden or bamboo xx.	wooden										6	For environmental protection, everybody should try not to use disposable xx.	disposable											chopsticks	serving chopsticks
7	家里/停电了，/小徐/只好/点上了/一根/xx	一根	6	2	1	11	1.93179	0	0	classifier	1	7	生日/宴会上，/大大的/蛋糕/插满了/xx	插满了	5	2	1	27	0.199079	0	1	verb	1		蜡烛	红蜡
7	During a power outage in his home, Xiao Xu had to light a xx.	a										7	At the birthday party, there is a big cake filled with xx.	filled with											candle	red candles
8	为了/上山/割草，/爷爷/磨好了/xx	磨好了	5	2	1	24	-0.11968	0	1	verb	1	8	农村/以前/收割/小麦/主要/使用/xx	使用	6	2	1	13	2.39418	0	1	verb	1		镰刀	弯刀
8	In order to cut the grass on the mountain, Grandfather sharpened the xx.	sharpen										8	In the past, people mainly harvested wheat using a xx.	use											sickle	machete
9	为了/打赢/官司，/他/专门/请了/一位/xx	一位	7	2	1	8	2.31222	0	0	classifier	1	9	为了/能够/对/弱者/提供/法律/援助，/小华/成为了/一名/专业/xx	专业	11	2	1	9	1.92817	0	1	adj	1		律师	侦探
9	In order to win the lawsuit, he requested a xx.	a										9	In order to provide legal assistance for those in need, Xiao Hua became a professional xx.	professional											lawyer	detective
10	小李/在/情人节/送了/女友/一束/红色/xx	红色	7	2	1	12	1.40753	0	1	adj	1	10	求爱的/时候，/男生/经常/会/送/女生/带刺的/xx	带刺的	8	2	1	25	-0.320788	0	1	adj	1		玫瑰	月季
10	On Valentine's Day, Xiao Li sent his girlfriend a bouquet of red xx.	red										10	During courtship, boys often send girls thorny xx.	thorny											rose(s)	Chinese rose(s)
11	为了/避免/沾到/油污，/姐姐/洗碗的/时候/会/戴上/橡胶/xx	橡胶	10	3	1	25	0.937735	0.0666667	1	adj	1	11	为了/保护/双手，/搬卸工/会/佩戴/防滑/耐磨的/xx	耐磨的	8	2	1	33	0.38197	0	1	adj	1		手套	袖套
11	In order to avoid oil stains, when washing dishes my older sister wears rubber xx.	rubber										11	in order to protect their hands, porters wear xx that are slip resistant and anti-friction.	anti-friction											gloves	sleevelet(s)
12	婚礼上的/主角/当然/是/新郎/和/xx	和	6	1	0	8	3.67478	0.733333	0	functional	1	12	结婚/仪式上，/新郎/深情地/看着/美丽的/xx	美丽的	6	2	1	24	1.54042	0	1	adj	1		新娘	妻子
12	The most important people at the wedding are of course the groom and xx.	and										12	At the wedding ceremony, the groom looked affectionately at the xx.	beautiful											bride	wife
13	由于/视力/下降，/小韩/去店里/配了/一副/新的/xx	新的	8	2	1	21	3.24744	0	1	adj	1	13	运动的/时候，/视力/不是/很好的/小欢/喜欢/佩戴/隐形/xx	隐形	9	2	1	18	0.443352	0.4	1	adj	1		眼镜	镜片
13	Due to his worsening eyesight, Xiao Han went to the store to get a new pair of xx.	new										13	Xiao Huan has poor vision, so she likes to wear invisible xx (contact lenses) during exercising,.	invisible											eyeglasses	lenses
14	为/庆祝/端午节，/妈妈/买了/很多/不同/口味的/xx	口味的	8	2	1	19	0.780173	0.0666667	1	adj	1	14	为了/纪念/屈原，/人们/用/苇叶/和/糯米/制作了/可口的/xx	可口的	10	3	1	16	0.844131	0	1	adj	1		粽子	肉粽
14	To celebrate the Dragon Boat Festival, Mom bought many different flavors of xx.	flavor										14	In order to commemorate Qu Yuan, people use reed leaves and sticky rice to make delicious xx.	delicious											rice dumplings	rice dumplings with meat filling
15	小丽/在/沙滩上/捡到/很多/美丽的/xx	美丽的	6	2	1	24	1.54042	0.0666667	1	adj	1	15	在/这片/白色/沙滩上，/随处/可以/捡到/大小不一的/xx	大小不一的	8	2	1	19	-0.121347	0	1	adj	0.933333		贝壳	石子
15	At the beach, Xiao Li picks up many beautiful xx.	beautiful										15	Everywhere on this white sand beach, you can pick up different sizes of xx.	different sizes of											shell(s)	pebble(s)
16	铁观音、/龙井/和/普洱/都是/中国/很有名的/xx	很有名的	7	1	1	29	1.28255	0	1	adj	0.933333	16	采茶/姑娘/正在/全神贯注地/采摘/xx	采摘	5	2	1	22	0.486811	0.0666667	1	verb	1		茶叶	春茶
16	Tieguanyin, Longjing, and Pu-erh are all well-known Chinese xx.	well-known										16	The tea picking lady is very focused on picking leaves for the xx.	pick											teas	spring tea(s)
17	河边/有几只/正在/用/鼻子/喷水的/xx	喷水的	6	3	1	24	0.232503	0.0666667	1	adj	0.933333	17	动物园/里/鼻子/最长的/动物/是/xx	是	6	2	1	9	3.90541	0.866667	0	functional	1		大象	野象
17	On the riverbanks, there are a few xx who are using their trunks to spray water.	spraying										17	In the zoo, the animal with the longest nose is the xx.	is											elephants	wild elephant
18	上个/世纪初，/莱特/兄弟/发明了/世界上/第一架/xx	第一架	7	2	1	21	0	0.866667	1	adj	1	18	很多/有钱人/除了/跑车/和/游艇，/甚至/买了/私人/xx	私人	9	2	1	9	1.34746	0.2	1	adj	0.933333		飞机	机翼
18	At the beginning of the last century, the Wright brothers invented the world's first xx.	first										18	Besides sports cars and yachts, many wealthy people even buy private xx.	private											airplane	airplane wings
19	现在/一集/电视剧/中间/不许/插播/太多/xx	太多	7	1	0	10	1.32894	0	1	adj	1	19	很多人/都/不喜欢/脑白金/在/电视上/做的/xx	做的	7	2	1	19	2.79217	0.133333	1	verb	0.933333		广告	新闻
19	Now an episode of a TV series is not allowed to play too many xx in the middle.	too many										19	Many people do not like it when Naobaijin (a lousy Chinese advertisement) comes on during the TV xx.	make											advertisements	news
20	每个/国家/都有/自己/特色鲜明的/国歌和/xx	国歌和	6	1	0	30	0.689996	0	1	noun	0.933333	20	很多/运动员/在/领奖台上/会/身披/本国的/xx	本国的	7	2	1	21	1.35257	0	1	adj	1		国旗	服饰
20	Every country has its own distinct national anthem and xx.	national anthem and										20	Many athletes on the medal podium wear their national xx	national											flag	clothing
21	今年/过年的/时候，/很多人/在/微信群里/抢/大大小小的/xx	大大小小的	8	3	1	20	0.533199	0	1	adj	1	21	婚宴上/亲朋好友/会/塞给/新娘/xx	新娘	5	2	1	23	0.805018	0.133333	1	noun	0.933333		红包	礼金
21	During this year's New Year's festival, many people fought for the xx of different amounts in wechat groups.	different amounts										21	At a wedding banquet, friends and family give the new bride xx.	bride											red envelopes	cash gift(s)
22	小偷/最怕/遇上的/就是/xx	就是	4	1	0	21	2.69342	0.0666667	0	functional	0.933333	22	两会/期间，/天安门/附近/增加了/很多/便衣/xx	便衣	7	3	1	15	0.21142	0	1	noun	1		警察	巡警
22	Thieves are most afraid of running into the xx.	is										22	During the two sessions near Tiananmen Square, there was an increase in the number of undercover xx.	undercover											police	constable(s)
23	在/沙漠中，/经常/会看到/驮运/货物的/xx	货物的	6	2	1	24	1.37028	0.4	1	noun	0.933333	23	背上/有/双峰的/动物/叫做/xx	叫做	5	2	1	16	1.29906	0.0666667	0	functional	1		骆驼	骡马
23	In the desert, one often sees goods being transported by xx.	goods										23	The animals with two humps are called xx.	called											camel	mules
24	现在/很多/地方/都可以/手机/付款，/所以/钱包里/不用/带/太多/xx	太多	11	2	1	10	1.32894	0.0666667	1	adj	0.933333	24	这里/不能/刷卡，/只能/使用/xx	使用	5	2	1	13	2.39418	0	1	verb	1		现金	纸币
24	Nowadays, many places accept mobile phone payment, so there is no need to carry too much xx in your wallet.	much										24	Credit cards are not accepted here, you can only use xx.	use											cash	cash
25	他/立志/成为/一名/救死/扶伤的/xx	扶伤的	6	1	0	21	-0.295771	0.933333	1	adj	0.933333	25	医院里/有/很多/忙碌的/护士和/xx	护士和	5	1	0	18	0.862414	0	1	noun	1		医生	中医
25	He is determined to save lives by becoming a life-saving xx.	life-saving										25	Inside the hospital, there are many busy nurses and xx.	nurse and											doctor (s)	doctors of traditional Chinese medicine
26	小佳/在/刚买的/明信片上/贴好了/xx	贴好了	5	2	1	17	-0.42071	0	1	verb	0.933333	26	爷爷/是一个/集邮/爱好者，/家里/收藏了/很多/珍贵的/xx	珍贵的	8	2	1	26	1.07725	0.133333	1	adj	1		邮票	照片	小佳买了明信片。	correct
26	On the postcard that he just bought, Xiao Jia stuck a xx.	stuck										26	Grandpa is a stamp-lover, and his home collection has many valuable xx.	valuable											stamp(s)	photo(s)	Xiao Jia bought some postcards.	correct
27	野营的/伙伴们/齐心合力/搭建/起了/xx	起了	5	1	0	12	3.15209	0	0	functional	1	27	地震/过后，/人们/不得不/选择/住/临时/搭建的/xx	搭建的	8	2	1	28	0.129314	0.0666667	1	adj	0.933333		帐篷	木屋	伙伴们在野营。	correct
27	The camping buddies worked together to build a xx.	partical (meaning finished)										27	After the earthquake, people have no choice but to live in temporarily built xx.	built											tent(s)	cottage(s)	The buddies are camping.	correct
28	为了/办公/方便，/小赵/买了/一台/手提/xx	手提	7	2	1	16	0.660707	0	1	adj	0.933333	28	作为/一个/程序员，/小马/工作/离不开/xx	离不开	6	2	1	18	0	0	1	verb	0.933333		电脑	硬盘	小赵需要办公。	correct
28	For convenience in the office, Xiao Zhao bought a portable xx.	portable										28	As a programmer, Xiao Ma can not do his work without a xx.	leave without											computer	hard disk(s)	Xiao Zhao needs to work.	correct
29	小曼/喜欢/佩戴/饰品，/她/在/手指上/戴了/好几枚/xx	好几枚	9	2	1	16	0	0	0	classifier	0.933333	29	在西方，/人们/结婚后/会在/无名指上/佩戴/xx	佩戴	6	4	1	25	0.328268	0	1	verb	0.933333		戒指	指环	小曼手指上戴了饰品。	correct
29	Xiao Man likes to wear jewelery, and on her fingers she wears several xx.	several										29	After marriage, people in the West wear on their ring finger their wedding xx.	wear											ring(s)	ring(s)	Xiao Man wears accessories on her finger.	correct
30	很多/男生的/偶像/都是/乔丹，/因为/他们/非常/热爱/xx	热爱	9	2	1	20	1.15251	0.0666667	1	verb	0.933333	30	小刚/在篮板下/纵身/起跳，/接住了/大家/争抢的/xx	争抢的	7	3	1	21	-0.117186	0.0666667	1	adj	0.933333		篮球	手球	乔丹是很多男生的偶像。	correct
30	Michael Jordan is many boys' idol because they love xx.	love										30	Xiao Gang jumped up from under the hoop, and caught the xx that everyone was fighting for.	fighting for											basketball	handball	Jordan is the idol of many boys.	correct
31	走秀场上/有很多/身材/很好的/xx	很好的	4	2	1	23	1.99203	0.0666667	1	adj	0.933333	31	有一名/画家/在/公开/招聘/人体/xx	人体	6	1	0	9	1.54786	0	1	noun	0.933333		模特	超模
31	On the catwalk, there are many xx with good figures.	very good										31	A painter is publicly recruiting body xx.	body											models	super models
32	中秋节/到了，/公司/给大家/发了/一盒/包装/精美的/xx	精美的	8	2	1	31	0.974454	0.466667	1	adj	0.933333	32	全家人/围坐/在一起，/一边/欣赏/圆月/一边/品尝/各种/馅料的/xx	馅料的	10	3	1	29	0	0	1	adj	0.933333		月饼	点心
32	When the Mid-Autumn Festival arrives, companies give everyone a box of beautifully wrapped xx.	beautiful										32	The family sits together enjoying watching the round moon and eating xx with different stuffings	stuffing											moon cakes	desserts
33	毕业生/在/招聘/现场/分发/自己的/xx	自己的	6	2	1	17	2.87618	0.2	0	pronoun	0.866667	33	为了/找工作，/小文/一直/在/准备/个人/xx	个人	7	3	1	5	2.51451	0.0666667	1	adj	1		简历	简介
33	The graduates at the job fair give out their xx.	own										33	In order to look for a job, Xiao Wen has all along been preparing her personal xx.	personal											resume	introduction
34	蒋田/腿部/骨折，/近期/出门/只能/坐/xx	坐	7	2	1	7	2.28853	0.333333	1	verb	1	34	爸爸/给/瘫痪的/爷爷/买了/xx	买了	5	2	1	8	2.40702	0.0666667	1	verb	0.866667		轮椅	汽车
34	Since Jiang Tian fractured his leg, he can only go out sitting in a xx.	sit										34	Dad bought my paralyzed grandfather a xx.	bought											wheelchair	car
35	张玲/在/供应/乳制品的/农场/看到/很多只/xx	很多只	7	2	1	20	0	0	0	classifier	0.866667	35	这个/牧场/养殖着/很多/产乳量/很高的/xx	很高的	6	2	1	27	1.6692	0.266667	1	adj	1		奶牛	牛犊
35	At the dairy farm, Zhang Ling saw many xx.	many										35	This farm has many xx that produce a lot of milk.	a lot of											cows	calves
36	经过/多次/试验，/袁隆平/研制了/杂交/xx	杂交	6	2	1	12	0.714775	0.533333	1	adj	1	36	长江/以北/种植/小麦，/以南/种植/xx	种植	6	2	1	21	1.36198	0	1	verb	0.866667		水稻	稻谷
36	After many tests, Yuan Longping developed hybrid xx.	hybrid										36	To the north of the Yangtze grows wheat, and to the south grows xx.	grow											rice	rice
37	在/一些/没有/空气/污染的/地区，/一抬头/就可以/看到/蔚蓝的/xx	蔚蓝的	10	2	1	35	0.12281	0.0666667	1	adj	1	37	一阵/大雨/过后，/一道/彩虹/出现/在了/远处的/xx	远处的	8	2	1	20	1.00551	0	1	adj	0.866667		天空	苍穹
37	In some areas with no air pollution, you can look up and see the blue xx.	blue										37	After the heavy rain, a rainbow appeared in the distant xx.	distant											sky	sky
38	中国/北方/大部分/地区/每年/春节/必吃/xx	必吃	7	2	1	11	-0.499891	0	1	verb	0.933333	38	过年的/餐桌上，/每家/每户/都会/有/一碗/热气腾腾的/xx	热气腾腾的	8	2	1	48	-0.10949	0.0666667	1	adj	0.866667		饺子	水饺
38	Every year during Chinese New Year, most families in Northern China eat xx.	must eat										38	On the table during New Year's celebrations, each household has a bowl of steaming xx.	steaming											dumplings	dumplings
39	经理/为/客人们/预定了/当地的/五星级/xx	五星级	6	2	1	19	-0.025169	0	1	adj	0.866667	39	小卫/出差的/时候，/一般/会/住在/口碑/比较好的/连锁/xx	连锁	9	2	1	19	0.963932	0.0666667	1	adj	0.933333		酒店	旅店
39	For the guests, the manager booked a five-star xx.	five-star										39	When Xiao Wei goes on business trips, he usually stays at more reputable chain xx.	chain											hotel	hostel(s)
40	四川人/做饭时/一般/会放/花椒和/xx	花椒和	5	2	1	27	0.193316	0	1	noun	0.866667	40	这道/水煮鱼/里面/放了/很多/红红的/xx	红红的	6	1	0	20	1.26801	0	1	adj	0.933333		辣椒	底料
40	When cooking, Sichuan people generally use pepper and xx.	pepper and										40	Inside this boiled fish they put a lot of red xx.	red											chili	hotpot seasoning
41	为了/保暖，/中国人/经常/会在/被褥/里面/填充/厚厚的/xx	厚厚的	9	3	1	26	0.565111	0	1	adj	0.933333	41	这些/可以/用来/纺线的/白色/花朵/叫做/xx	叫做	7	2	1	16	1.29906	0	1	verb	0.866667		棉花	棉绒
41	In order to keep warm, Chinese people often fill their bed sheets with thick xx.	thick										41	These white flowers that can be used for spinning are called xx.	called											cotton	lint
42	菜市场上/可以/买到/很多/新鲜的/蔬菜/和/xx	和	7	2	1	8	3.67478	0.733333	0	functional	0.933333	42	这个/卖/鲜榨/果汁的/小店/每天/早上/都去/果蔬/市场/批发/很多/xx	很多	12	4	1	15	1.99211	0	1	adj	0.866667		水果	橙子	菜市场上的东西很新鲜。	correct
42	At the market, you can buy a lot of fresh vegetables and xx.	and										42	This store sells fresh juice, and it wholesales lots of xx from the vegetable and fruit markets.	many											fruit	oranges	The things at the market are very fresh.	correct
43	出国/旅游的/时候，/小谦/拍了/很多张/xx	很多张	6	2	1	22	0	0	1	adj	0.933333	43	申请/护照的/时候，/需要/拍摄/一张/正面/免冠/xx	免冠	8	2	1	16	-0.479846	0.266667	1	adj	0.866667		照片	相片	小谦出国旅游了。	correct
43	While he was traveling abroad, Xiao Qian took many xx.	many										43	When applying for a passport, you need to take a xx without wearing a hat.	without wearing a hot											photos	photo	Xiao Qian went abroad.	correct
44	小希/把/辫子/散开，/认真地/梳理着/自己的/xx	自己的	7	2	1	17	2.87618	0.0666667	0	pronoun	1	44	刚刚/剃光头的/男孩/很怀念/自己/曾经/浓密的/xx	浓密的	7	1	1	28	0.156057	0	1	adj	0.8		头发	金发
44	Xiao Xi unravelled her braid, carefully combing her xx.	own										44	The boy who just shaved his head misses his thick xx.	thick											hair	blond hair
45	为了/防止/细菌/滋生，/最好/经常/更换/擦手/和/擦脸的/xx	擦脸的	10	2	1	36	0.525415	0.2	1	adj	0.8	45	为了/赶紧/把头发/擦干，/小琴/换了/一条/更为/吸水的/xx	吸水的	9	2	1	18	0.213842	0.2	1	adj	1		毛巾	纸巾
45	To prevent bacteria from growing, it is best to frequently replace the xx you use to dry your hands and face.	for drying face										45	To dry his hair quickly, Xiao Qin changed to a more absorbent xx.	absorbent											towel	paper towel
46	电影/颁奖礼上/聚集了/很多/耀眼的/xx	耀眼的	5	2	1	39	0.529128	0	1	adj	1	46	追星族/会/不顾一切地/支持/自己/喜欢的/xx	喜欢的	6	1	1	26	1.90796	0	1	adj	0.8		明星	影星
46	The film awards ceremony brought together many gorgeous xx.	gorgeous										46	Fans all try their best to support their favorate xx.	favorate											celebrities	movie stars
47	为了/打开/这把/锁，/老李/从/口袋里/拿出来/一把/xx	一把	9	3	1	8	2.30683	0	0	classifier	0.8	47	因为/家里/没人/给开门，/小月只好/从包里/取出来/备用/xx	备用	8	3	1	13	0.555869	0	1	adj	1		钥匙	锁匙	老李想打开锁。	correct
47	In order to open the lock, Lao Li took out from his pocket a xx.	a										47	Since no one was at home to open the door, Xiao Yue had to take out from his bag the spare xx.	spare											key	key	Lao Li wanted to open the lock.	correct
48	爸爸/在/垂钓店/买了/一根/高档/xx	高档	6	2	1	20	1.12908	0	1	adj	0.866667	48	因为/喜欢/钓鱼，/爷爷/自制了/5米长的/xx	5米长的	6	2	1	18	0	0	1	adj	0.866667		鱼竿	竹竿	爸爸去了垂钓店。	correct
48	In the fishing store, Dad bought a high-end xx.	high-end										48	Because he likes fishing, Grandpa made his own 5-meter long xx.	5-meter long											fishing rod	bamboo pole	Dad went to the fishing store.	correct
49	下雨的/时候，/路上/行人/都/撑着/花花绿绿的/xx	花花绿绿的	7	2	1	44	-0.0969589	0	1	adj	0.866667	49	天气/预报/今天/有雨，/所以/你/出门的/时候/最好/带着/xx	带着	10	3	1	20	2.69311	0	1	verb	0.866667		雨伞	阳伞
49	When it rains, the pedestrians on the road all carry colorful xx.	colorful										49	The weather forecast has rain for today, so when you go out it is best to bring a xx.	bring											umbrellas	parasol
50	小王/来到/自动/取款机前，/插入/银行卡/后，/输入了/一串/xx	一串	9	3	1	8	1.38092	0	0	classifier	0.8	50	为了/保证/帐户/安全，/你/需要/定期/修改/登陆/xx	登陆	9	2	1	19	1.13503	0	1	adj	0.933333		密码	字母	小王输入了一些信息。	correct
50	Xiao Wang came to the ATM, inserted his bank card, and entered his xx.	a										50	In order to keep your account safe, you have to change your login xx regularly.	login											password	letter	Xiao Wang entered some information.	correct
51	在/江北的/冬天，/政府/会/集中供应/xx	集中供应	6	2	1	31	1.53133	0	1	verb	0.8	51	在/北方/生活，/夏天/需要/空调，/冬天/需要/xx	需要	8	3	1	23	2.40333	0	1	verb	0.933333		暖气	热水
51	During the winter in Jiangbei, the government will starting supplying xx at a fixed time.	supply at a fixed time										51	Living in the North, summer requires air conditioning, and winter requires xx.	require											heating	hot water
52	摇篮里/躺着/一个/正在/熟睡的/xx	熟睡的	5	3	1	36	0.107655	0.4	1	adj	0.933333	52	医院的/育婴室里/有/很多/新生的/xx	新生的	5	2	1	26	1.259	0	1	adj	0.8		婴儿	小孩
52	In the cradle there is a sleeping xx.	sleeping										52	In the hopsital nursery, there are many newborn xx.	newborn											baby	children
53	为了/破案，/他们/分析了/凶器上的/xx	凶器上的	5	2	1	31	-0.0886398	0	1	adj	0.8	53	现在/很多/国家的/出入境处/都/需要/采集/旅客/双手的/xx	双手的	9	3	1	16	1.28743	0	1	adj	0.933333		指纹	纹路
53	To crack the case, they looked at the weapon to analyze the xx.	on the weapon										53	Now at the entry and exit of many countries, it is required to collect each passengers' xx of both hands.	of two hands											fingerprints	lines
54	老沈/在/兜里/摸了/半天，/只找到/几枚/五分的/xx	五分的	8	2	1	16	1.37517	0	1	adj	1	54	小晨的/存钱罐/里/有/很多/几分钱的/xx	几分钱的	6	2	1	24	0	0	1	adj	0.733333		硬币	钱币
54	Lao Chen felt around in his pocket for a long time, only to find a few 5 cent xx.	5 cent										54	In Xiao Chen's piggy bank, there are many xx with several cents.	of several cents											coins	money
55	小萱/养了/一只/象征/和平的/白色/xx	白色	6	1	1	11	1.40734	0	1	adj	0.8	55	在/欧洲的/广场上，/经常/会/看到/觅食的/白色/xx	白色	8	2	1	11	1.40734	0	1	adj	0.866667		鸽子	海鸥	小萱从来都不养宠物。	wrong
55	Xiao Xuan raised a symbol of peace, a white xx.	white										55	In squares in Europe, one often sees people feeding white xx.	white											pigeon(s)	seagull(s)	Xiao Xuan never had any pet.	wrong
56	除了/自己/母语的/其他/语言/都可以/叫做/xx	叫做	7	2	1	16	1.29906	0.0666667	1	verb	0.866667	56	对于/中国人/来讲，/英语/和/法语/都是/xx	都是	7	2	1	19	2.3494	0.4	0	functional	0.8		外语	方言
56	All the languages except the native language can be called xx.	called										56	For the Chinese, both English and French are xx.	are											foreign languages	dialects
57	为了/庆祝/新年的/到来，/世界/各地/都会/燃放/五彩斑斓的/xx	五彩斑斓的	9	2	1	51	0	0	1	adj	0.866667	57	除夕夜，/小玉/抬头/看着/夜空中/短暂/而/绚烂的/xx	绚烂的	8	3	1	26	-0.120303	0.133333	1	adj	0.8		烟花	火花	有些国家不会庆祝新年的到来。	wrong
57	To celebrate the New Year, people all over the world will set off colorful xx.	colorful										57	On New Year's Eve, Xiao Yu looked at the night sky at the brief but gorgeous xx.	gorgeous											fireworks	sparks	Some countries don't celebrate the arrival of the new year.	wrong
58	玲玲/到/三星/专卖店/买了/一部/xx	一部	6	2	1	11	1.89069	0.2	0	classifier	0.933333	58	大家/打电话/和/上网/都/离不开/xx	离不开	6	2	1	18	0	0	1	verb	0.733333		手机	手提	玲玲从来都不去专卖店。	wrong
58	Lingling went to the Samsung store and bought a xx.	a										58	Everyone's telephone and internet access are inseparable in a xx.	can not leave											cell phone(s)	cell phone(s)	Ling Ling never went to the store.	wrong
59	猴子/非常/喜欢/吃/xx	吃	4	1	0	6	2.41171	0.4	1	verb	0.933333	59	这种/船型的/容易/剥皮的/热带/水果/是/xx	是	7	2	1	9	3.90541	0.266667	0	functional	0.733333		香蕉	芭蕉	猴子不喜欢吃水果。	wrong
59	Monkeys really like eating xx	eat										59	The kind of tropical fruit that has a boat shape and is easy to peel is the xx.	is											bananas	plantain	Monkeys don't like fruits.	wrong
60	很多人/晒太阳的/时候/会戴/墨镜，/可能/是/因为/刺眼的/xx	刺眼的	9	2	1	27	-0.131392	0	1	adj	0.733333	60	很多人/来到/沙滩上/晒太阳，/因为/大家/都很/享受/温暖的/xx	温暖的	9	2	1	33	1.13028	0	1	adj	0.933333		阳光	光芒	很多人从来都不会晒太阳。	wrong
60	Many people wear sunglasses in the sun, possibly due to the glaring xx.	glaring										60	.Many people come to the beach to sunbathe because everyone enjoys the warm xx	warm											sunshine/sunlight	light	Many people never get exposed in the sun.	wrong
61	紧张的/时候/可以/试着/多做/几个/深/xx	深	7	2	1	11	2.66719	0.866667	1	adverb	1	61	患有/支气管炎的/老李/经常/感到/胸闷，/很难/顺畅地/xx	顺畅地	8	3	1	23	0.151341	0	1	adverb	1		呼吸	吸气
61	When stressed, try to xx deeply.	deep										61	Lao Li often feels tightness in his chest due to suffering from bronchitis, so it is difficult for him to xx smoothly.	smoothly											breathe	breathe in
62	为了/踊跃/回答/问题，/课堂上的/孩子们/都把/小手/高高/xx	高高	9	2	1	20	1.01846	0.466667	1	adverb	1	62	运动会上，/选手/把/100公斤/重的/杠铃/稳稳/xx	稳稳	7	2	1	28	0.236432	0	1	adverb	1		举起	抬起	孩子们在上课。	correct
62	To answer questions, the children in class all xx their hands very high.	high										62	At the Games, the competitor xx the heavy 100 kg barbell steadily.	steadily											raise/lift	raise	The children are having a class.	correct
63	为了/庆祝/生日，/很多/朋友/一起/去/KTV/xx	KTV	8	3	1	0	0	0.133333	1	noun	0.933333	63	虽然/小刘/五音/不全，/但是/他很/喜欢/xx	喜欢	7	2	1	18	1.90796	0.266667	1	verb	1		唱歌	点歌	一些朋友在庆祝生日。	correct
63	To celebrate a birthday, many friends go to KTV to xx.	KTV										63	Although Xiao Liu doesn't have great pitch, he still likes to xx.	like											sing	request songs	Some friends are celebrating a birthday.	correct
64	这个/小品/把/观众们/逗得/哈哈/xx	哈哈	6	1	0	18	1.08842	0.133333	1	adverb	1	64	无忧/无虑的/孩子们/经常/会/无缘/无故地/开怀/xx	开怀	8	1	0	11	0.111035	0.0666667	1	adverb	0.933333		大笑	狂笑	小品很搞笑。	correct
64	Amused by the comedy sketch, everyone in the audience xx loudly.	loudly										64	Carefree children often xx happily for no reason.	happily											laugh	laugh hard	The comedy sketch is very funny.	correct
65	小宋/经常/用/铅笔/在/素描本上/写写/xx	写写	7	2	1	10	0.525415	0	1	verb	1	65	小刘的/妈妈/是/画家，/所以/小刘/很早/就/开始/学习/xx	学习	10	3	1	11	2.11872	0.333333	1	verb	0.933333		画画	绘画
65	Xiao Song often uses a pencil to write and xx in his sketchbook.	write										65	Xiao Liu's mother is a painter, so Xiao Liu began learning to xx very early.	learn											draw/paint	draw/paint
66	最后，/小杨/只好/在/离婚/协议书上/乖乖/xx	乖乖	7	2	1	16	0.387835	0	1	adverb	1	66	在/做/重大/手术/之前，/一般/需要/直系/亲属/来/xx	来	10	2	1	7	3.52215	0	0	functional	0.933333		签字	签名	小杨要离婚了。	correct
66	At last, Xiao Yang had to obediently xx the divorce agreement.	obediently										66	Before a major surgery, it is generally required for immediate family to xx.	to											sign	sign	Xiao Yang is going to get divorced.	correct
67	意见/不同/可以/讲道理，/不要/进行/人身/xx	人身	7	2	1	9	1.37049	0.2	1	adverb	1	67	金枪鱼/在/水下/遭到/大白鲨的/猛烈/xx	猛烈	6	2	1	21	0.954249	0	1	adverb	0.933333		攻击	打击
67	Different opinions can be justified, there is no need to xx them personally.	personally										67	The tunafish underwater were xx by the great white shark fiercely.	fiercely											attack	hit
68	只要/人/活着，/心脏/就会/一直/xx	一直	6	2	1	9	2.09487	0.133333	1	adverb	1	68	小马/经常/会/感觉到/手臂上的/脉搏/在/xx	在	7	2	1	6	3.85281	0.0666667	0	functional	0.933333		跳动	律动
68	As long as people are alive, their hearts will always xx.	always										68	Xiao Ma can often feel the pulse on his arm xx.	particle (meaning ongoing)											beat	beat regularly
69	由于/茶水/太烫，/小吕/不停地/对着/茶杯/xx	茶杯	7	3	1	17	0.253518	0.0666667	1	noun	0.933333	69	小马/深吸/一口气，/用力地/往/气球/里面/xx	里面	7	3	1	16	1.60523	0	0	prop	0.933333		吹气	鼓气	小吕准备喝茶。	correct
69	Since the tea is too hot, Xiao Lv keeps xx towards the cup.	cup										69	Xiao Ma took a deep breath, and xx air into the ballon.	into											blow	blow	Xiao Lv is preparing to drink some tea.	correct
70	听到/这个/感人的/演讲/以后，/观众们/开始/热烈地/xx	热烈地	8	2	1	26	1.40199	0	1	adverb	0.933333	70	看到/儿子的/精彩/表演后，/妈妈/开始/用力地/xx	用力地	7	2	1	13	0.978874	0	1	adverb	0.933333		鼓掌	拍手
70	After hearing this moving speech, the audience began to xx warmly.	warmly										70	After seeing her son's wonderful performance, the mother began to xx loudly.	loudly											applaud	clap hands
71	看到/逃跑中的/小偷/向/自己/跑来，/大妈/故意/伸腿/把他/xx	把他	10	2	1	12	2.32761	0.133333	0	prop	1	71	这个/门口的/台阶/设计/不合理，/很容易/就会/把/进门的人/xx	进门的人	9	3	1	20	0	0	1	noun	0.866667		绊倒	绊住
71	Seeing the escaping thief running towards her, the woman purposely extends her leg to xx him.	to make him										71	The doorstep was not designed correctly, so people entering through the door can easily xx.	people entering through the door											trip	stumble
72	一堆/赌徒/正在/非法/棋牌室/进行/xx	进行	6	2	1	13	2.72187	0.0666667	1	verb	1	72	虽然/输了/很多钱，/老张/仍然/忍不住/出去/外面/xx	外面	8	3	1	14	1.34518	0	1	noun	0.866667		赌博	豪赌
72	A group of gamblers are xx illegally in the chess room.	doing										72	Despite losing a lot of money, Lao Zhang could not help but go out and xx.	outside											gamble	gamble crazily
73	神枪手/瞄准了/目标，/准备/开始/xx	开始	5	2	1	12	2.46759	0	1	verb	1	73	狙击手/隐藏在/制高点，/瞄准/目标/准备/xx	准备	6	3	1	18	2.09608	0.266667	1	verb	0.866667		射击	袭击
73	The sharpshooter aimed at the target, getting ready to start xx.	start										73	The sniper hid at the highest point, aiming at the target and preparing to xx.	prepare to											shoot	attack
74	为了/防止/表皮/营养/流失，/小郭/吃梨时/一般/不会/xx	不会	9	3	1	10	2.2271	0	0	functional	0.866667	74	小梅/认为/果皮/含有/丰富/维生素，/所以/她/吃/苹果/从来/都不/xx	都不	12	4	1	14	2.50054	0	0	functional	1		削皮	去皮
74	To avoid losing the nutritional value of the pear skin, Xiao Guo generally eats pears without xx them.	will not										74	Xiao Mei thinks that fruit skin is rich in vitamins, so she never xx apples when she eats them.	never											peel	peel
75	持/不同/观点的/正反/双方/开始了/自由/xx	自由	7	1	0	11	2.15824	0	1	adverb	0.933333	75	在/比赛中，/双方/坚持/自己/观点/进行了/精彩地/xx	精彩地	8	3	1	31	1.16666	0	1	adverb	0.866667		辩论	争论
75	The proponents of the different sides started to freely xx.	freely										75	In the competition, the two sides each adhered to their own point of view for a wonderful xx.	wonderful											debate	argument
76	为了/提升/员工/业务/水平，/公司/会/定期/开展/员工/xx	员工	10	3	1	10	1.36558	0.133333	1	noun	0.866667	76	很多/公司/都会/对/员工/进行/上岗前/xx	上岗前	7	2	1	19	0	0	0	prop	0.933333		培训	训练
76	To increase the productivity of the staff, the company will xx the staff regularly.	stuff										76	Many companies xx their employees before they get started.	before started											train	practice
77	天气/很好，/一对/情侣/手拉手/在/林荫/路上/xx	路上	8	4	1	16	1.63148	0.0666667	1	noun	0.933333	77	晚饭/过后，/老李/经常/和/老伴/一起/去/公园/xx	公园	9	4	1	11	1.37448	0.0666667	1	noun	0.866667		散步	踱步
77	The weather is very nice, so a couple xx hand in hand on the shady road.	road										77	After dinner, Lao Li often goes to the park with his wife to xx.	park											take a walk	stroll
78	一位/园丁/正在/用/特制/工具/对/园林里的/植物/进行/xx	进行	10	2	1	13	2.72187	0.533333	1	verb	0.866667	78	为了/让/树木/看起来/更有型，/养护/人员/会/定期/对/枝叶/进行/xx	进行	12	3	1	13	2.72187	0.6	1	verb	0.933333		修剪	修葺
78	A gardener is using special tools to xx the plants in the garden.	doing										78	In order to make the trees have a better shape, the caretakers regularly xx the branches and leaves.	doing											trim	repair
79	夏天/一到，/小韩/就/经常/跳到/河里/去/xx	去	8	3	1	5	3.14665	0	0	functional	0.866667	79	天气/一热，/很多人/都/选择/去/泳池/xx	泳池	7	3	1	14	0.410071	0	1	noun	0.933333		游泳	戏水
79	Once summer comes, Xiao Han often jumps into the river to xx.	to										79	When the weather is hot, many people choose to go xx in the pool.	pool											swim	play with water
80	因为/口渴，/小周/半夜/起来/去/xx	去	6	3	1	5	3.14665	0	0	functional	0.8	80	为了/给/身体/补充/必要的/水分，/大家/要多/xx	要多	8	2	1	15	1.42439	0.266667	0	functional	1		喝水	喝茶
80	Because he was thirsty, Xiao Zhou got up in the middle of the night to xx.	to										80	In order to give your body necessary moisture, everyone should xx a lot.	should											drink water	drink tea
81	为了/买到/春运/期间的/票，/很多人/从/夜里/就/开始/在/火车站/xx	火车站	12	3	1	18	0.744738	0.2	1	noun	1	81	这一家的/枣糕/非常/有名，/总是/能够/看到/很多人/在/xx	在	9	2	1	6	3.85281	0.2	0	functional	0.8		排队	等待
81	To buy tickets during the Spring Festival, many people began to xx at the train station the night before.	train station										81	This jujube cake is very famous, so you can always see a lot of people xx for it.	particle (meaning ongoing)											line up	wait
82	为了/保持/口腔/清洁，/人们/每天/用/牙刷/来/xx	来	9	3	1	7	3.52215	0	0	functional	0.8	82	为了/牙齿/健康，/很多/家长/每天/都给/宝宝/xx	宝宝	8	3	1	16	0.759975	0	1	noun	1		刷牙	清洁
82	In order to keep their mouths clean, people xx their teeth with a toothrbush everyday.	to										82	For dental health, many parents xx their babies' teeth everyday.	baby											brush	clean
83	小西/是/一名/舞蹈/老师，/她/每天/下午/都会/教/小朋友/xx	小朋友	11	3	1	15	0.762919	0.2	1	noun	1	83	炎热的/夏天，/很多/中年/妇女/都去/广场上/跟着/音乐/xx	音乐	9	4	1	14	2.01701	0.266667	1	noun	0.8		跳舞	扭动	小西从来不和小朋友打交道。	wrong
83	Xiao Xi is a dance teacher, and she teaches children to xx everyday.	children										83	In the hot summer, many middle-aged women go to the square to xx to music.	music											dance	twist	Xiao Xi never plays with children.	wrong
84	抱着/必死的/决心，/年轻的/勇士们/毅然/决然地/从/悬崖/xx	悬崖	9	2	1	22	0.550673	0	1	noun	1	84	为了/躲避/警察的/追捕，/歹徒/从/二层楼的/阳台/纵身/xx	纵身	9	3	1	14	0.173896	0.0666667	1	adverb	0.8		跳下	坠落	勇士们在欢呼。	wrong
84	Prepared to die, the young warriors resolutely xx from the cliffs.	cliffs										84	To escape from the police, the gangsters xx from the balcony of the second floor fast.	fast											jump	fall	The young warriors are cheering.	wrong
85	宝宝/喝完/奶/以后，/终于/开始/xx	开始	6	2	1	12	2.46759	0	1	verb	0.8	85	听到/呼噜声/后，/小赵/才知道/屋里/有人在/xx	有人在	7	3	1	14	0	0.2	0	prop	1		睡觉	午睡	宝宝什么也没吃。	wrong
85	After drinking milk, the baby finally began to xx.	begin										85	After hearing the snoring, Xiao Zhao knew everyone in the house was xx.	someone was											sleep	nap	The baby didn't eat anything.	wrong
86	小松/是个/诚实的/孩子，/从来/不会/xx	不会	6	2	1	10	2.2271	0.0666667	0	functional	0.866667	86	这个/男人/没有/一句话/是/真的，/经常/在/老婆/面前/xx	面前	10	3	1	18	1.74726	0.866667	0	prop	0.866667		撒谎	骗人	小松经常骗老师。	wrong
86	Xiao Song is an honest child who never xx.	will not										86	This man does not say anything true, often xx in front of his wife.	in front of											lie	lie	Xiao Song always lies to the teacher.	wrong
87	妈妈/不小心/碰倒了/杯子，/声音/把/熟睡的/女儿/xx	女儿	8	2	1	5	1.75541	0	1	noun	0.866667	87	小李/在/睡觉的/时候，/最/讨厌/别人/弄出/动静/把/他/xx	他	11	3	1	5	3.63706	0.8	0	pronoun	0.866667		吵醒	吓到
87	The mother accidentally knocked over the cup, and the noise xx her sleeping daughter.	daughter										87	When Xiao Li is sleeping, he hates when people move around and xx him.	him											wake up	scare
88	为了/让/这份/文件/具有/法律/效力，/相关/部门/需要/在/文件上/xx	文件上	12	3	1	13	1.76516	0.2	0	prop	0.8	88	出入境的/时候，/海关/人员/会/在/护照/签证页上/xx	签证页上	8	3	1	29	0	0	0	prop	0.933333		盖章	签章
88	In order for this document to be legally binding, the associated departments xx the document.	document										88	When entering and leaving the country, customs officers xx the passport visa page.	on the visa page											stamp	stamp
89	小苏/患有/肺结核，/所以/经常/xx	经常	5	2	1	19	1.83975	0.0666667	1	adverb	0.8	89	小瑞/喝水时/被/呛得/一直/在/xx	在	6	2	1	6	3.85281	0	0	functional	0.933333		咳嗽	打嗝	小苏很健康。	wrong
89	Xiao Su is suffering from tuberculosis, so he often xx.	often										89	Xiao Rui choked when drinking water and has been xx since.	particle (meaning ongoing)											cough	burp	Xiao Su is very healthy.	wrong
90	老鹰/在/空中/不停地/xx	不停地	4	2	1	21	1.28046	0	1	adverb	0.8	90	直升机/一直/在/屋顶/xx	屋顶	4	2	1	17	0.877921	0	1	noun	0.933333		盘旋	旋转
90	The eagle kept xx in the air.	nonstop										90	The helicopter has been xx over the roof.	roof											circle	spin
91	两个/国家/开战/之前，/需要/首先/向/彼此/正式/xx	正式	9	3	1	11	1.86672	0	1	adj	0.866667	91	911/事件/以后，/美国/正式/向/恐怖/组织/xx	组织	8	3	1	16	2.51669	0.2	1	noun	0.8		宣战	谈判
91	Before the two countries go to war, they need to first xx formally on each other.	formally										91	After 9/11, the United States formally xx on terrorist organizations.	organization											declare war	negotiate
92	小白的/妈妈/做饭/很/好吃，/所以/她/经常/在/家里/xx	家里	10	3	1	17	1.78964	0.266667	1	noun	0.733333	92	很多/学生/下课/以后，/会去/学校的/食堂/xx	食堂	7	3	1	20	0.66062	0.133333	1	noun	0.933333		吃饭	用餐
92	Xiao Bai's mother is a very good cook, so she often xx at home.	home										92	After class, many students go to the school cafeteria to xx.	cafeteria											eat	eat
93	飞机/降落/以后/先/不要/解开/安全带，/因为/它会/在/跑道上/继续/xx	继续	12	4	1	21	2.13157	0.0666667	1	verb	0.933333	93	汽车/紧急/刹车后，/仍然/可能会/在/雨后/路面上/xx	路面上	8	3	1	25	0.7733	0	0	prop	0.733333		滑行	行进
93	Do not unbuckle your seatbelt after the plane first lands, as it will continue to xx(taxi) down the runway.	continue										93	Even after braking, it is still possible for the car to xx on the road after it rains.	on the road											slide	move forward
94	京剧/开始前，/小亮/特意/走到/后台/看/演员/xx	演员	8	3	1	21	1.62064	0.733333	1	noun	0.733333	94	晓曼/从来/不会/素颜/出门，/她/每次/都要/用/半个/小时/来/xx	来	12	3	1	7	3.52215	0.0666667	0	functional	0.933333		化妆	准备	小亮去看京剧。	correct
94	Before the Peking opera began, Xiao Liang went backstage to see the actors xx.	actors										94	Xiao Man never goes out without makeup, and she takes half an hour every time to xx.	to											put on makeup	get ready	Xiao Liang went to watch Peking Opera.	correct
95	不同/时期的/学者/对/蒋介石的/为人/做出了/不一样的/xx	不一样的	8	2	1	23	0	0	1	adj	0.933333	95	在/淘宝上/买/东西，/买家/可以/随时/对/卖家/做出/xx	做出	10	3	1	16	1.57806	0	1	verb	0.733333		评价	评定	学者们有不同意见。	correct
95	The scholars from different periods xx Chiang Kai-shek differently.	different										95	After buying things on Taobao, customers can xx the seller at any time.	make											evaluate	assess	Scholars have different opinions.	correct
96	老师/选了/一篇/文章，/让/学生/大声地/xx	大声地	7	2	1	16	1.32343	0	1	adverb	0.8	96	早读/课上，/小学生们/正在/一本/正经地/齐声/xx	齐声	7	2	1	13	0.448589	0	1	adverb	0.8		朗读	诵读
96	The teacher selected an article and asked her students to xx loudly.	loudly										96	In morning classes, primary/elementary school students xx together.	together											read aloud	chant
97	家里的/热水器/不/工作了，/妈妈/只好/找/物业的/人/来/xx	来	10	2	1	7	3.52215	0.466667	0	functional	0.8	97	小亮/从小/就/喜欢/摆弄/电子/产品，/电脑/坏了/可以/找他/来/xx	来	12	3	1	7	3.52215	0	0	functional	0.8		修理	修复	妈妈联系了物业的人。	correct
97	The home water heater isn't working, so Mom has to find someone in the building to xx it.	to										97	Xiao Liang likes playing with digital products, so if your computer is broken you can ask him to xx it.	to											repair	repair	Mum contacted someone who works in the building.	correct
98	小武/拿出/一颗/口香糖，/放在/嘴里/慢慢/xx	慢慢	7	3	1	28	1.39279	0	1	adverb	0.733333	98	吞咽/之前/最好/对/食物/进行/充分/xx	充分	7	2	1	10	1.95159	0.0666667	1	adverb	0.866667		咀嚼	品味
98	Xiao Wu took out a piece of gum and xx it slowly in his mouth.	slowly										98	It is best to xx food thoroughly before swallowing.	thoroughly											chew	taste
99	屋里/暖气/很足，/所以/进门后/大家/都会/把/外套/xx	外套	9	3	1	15	0.516198	0.666667	1	noun	0.733333	99	下水/游泳/以前，/人们/一般/都会/把/鞋子/xx	鞋子	8	2	1	18	0.579917	0	1	noun	0.866667		脱掉	扔掉	屋里很暖和。	correct
99	The heating in the house is working well, so everyone xx their jacket after coming through the door.	jacket										99	Before swimming, people generally xx their shoes.	shoes											take off	throw away	It's very warm in the room.	correct
100	他/在/游乐场里/看到/很多/儿童/在/开心地/xx	开心地	8	3	1	14	0.923076	0	1	adverb	0.733333	100	一群/小伙伴/在/河边/愉快地/xx	愉快地	5	2	1	25	1.31828	0	1	adverb	0.866667		玩耍	嬉戏	游乐场里有很多儿童。	correct
100	He sees many children happily xx in the playground.	happily										100	A group of children xx happily by the river.	happily											play	play	There are many children at the playground.	correct
101	花丛里，/很多/蝴蝶/在/自由自在地/xx	自由自在地	5	2	1	29	0.227864	0	1	adverb	0.666667	101	冬日的/窗外，/雪花/在/漫天/xx	漫天	5	2	1	18	0.208251	0	0	prop	0.933333		飞舞	舞动
101	In the flowers, many butterflies xx freely.	freely										101	Outside the window in the winter, snowflakes xx in the sky.	in the sky											fly	fly
102	为了/产生/高能量，/物理学家/让/两种/粒子/进行/激烈地/xx	激烈地	9	2	1	32	1.51101	0	1	adverb	0.8	102	这辆/车/损毁/严重，/主要/是因为/和/高速路/护栏/进行了/xx	进行了	10	3	1	15	2.72187	0	1	verb	0.733333		碰撞	碰击
102	In order to produce high energy, the physicists allowed the two particles to xx violently.	violently										102	The car was damaged, mainly due to it xx the highway fence at a high speed.	make											collide	hitting
103	今年/冬天/很冷，/很多/小孩子/都去/湖面上/练习/xx	练习	8	3	1	11	1.13011	0	1	verb	0.8	103	一群/学生/穿好/冰鞋/和/护膝，/全副/武装地/准备/xx	准备	9	2	1	18	2.09608	0.266667	1	verb	0.733333		滑冰	速滑	小孩子们都在家里。	wrong
103	This winter is very cold, so many children go to the lake to practice xx.	practice										103	A group of students wear skates and knee pads, dressed to prepare to xx.	prepare to											skate	speed skate	Many children are staying home.	wrong
104	警察/对/抢匪/发出/最后/一次/xx	一次	6	2	1	7	2.71037	0	0	classifier	0.8	104	杀毒/软件/再次/对/这个/网站的/访问/发出/xx	发出	8	2	1	10	1.8295	0.133333	1	verb	0.733333		警告	示警	警察击毙了抢匪。	wrong
104	The police xx the robbers for the final time.	one										104	The antivirus software once again sent a xx against visiting this site.	send											warn	warning	The police shot the robbers to death.	wrong
105	丽丽/看到/一只/海龟/在/沙滩上/慢慢/xx	慢慢	7	2	1	28	1.39279	0.0666667	1	adverb	0.8	105	宝宝/走路/之前/会/先在/地上/学习/xx	学习	7	3	1	11	2.11872	0	1	verb	0.733333		爬行	匍匐	海龟在睡觉。	wrong
105	Lili saw a turtle xx slowly on the beach.	slowly										105	Before the baby can walk, it learns to xx on the ground.	learn											crawl	crawl	The turtle is sleeping.	wrong
106	为了/准备/下半年的/马拉松/比赛，/小吴/每天/傍晚/都去/公园/xx	公园	10	4	1	11	1.37448	0.0666667	1	noun	0.733333	106	学校/操场/修了/新跑道/以后，/越来/越多的/人/开始/在上面/xx	在上面	10	2	1	18	1.64844	0	0	prop	0.8		跑步	慢跑	小吴要参加跳高比赛。	wrong
106	In order to prepare for the marathon in the second half of the year, Xiao Wu went to the park every evening to xx.	park										106	After the new track was buit in the school, more and more people started to xx on it.	on it											run	jog	Xiao Wu is going to do the high jump.	wrong
107	鱼饵/一/投到/水里，/就/被/小鱼/紧紧/xx	紧紧	8	2	1	20	1.28955	0	1	adverb	0.8	107	小狗/用/牙齿/把/骨头/紧紧/xx	紧紧	6	2	1	20	1.28955	0	1	adverb	0.733333		咬住	夹住
107	The bait was cast into the water, and was tightly xx by a small fish.	tighly										107	The little dog tightly xx the bone with his teech.	tightly											bite	clip
108	捉迷藏的/时候，/伙伴们/用/手帕/把/小翔的/眼睛/xx	眼睛	8	3	1	24	1.90269	0.8	1	noun	0.733333	108	抢劫/银行的/时候，/这几个/劫匪/用/丝袜/把脸/xx	把脸	8	3	1	18	1.43662	0	0	prop	0.666667		蒙住	遮上
108	During hide-and-seek, Xiao Xiang's buddies used a handkerchief to xx him.	eyes										108	While robbing the bank, the robbers xx their faces with silk stockings.	do something to the face											blindfold/cover	cover
109	小欢/上火车/之前/买了/零食/准备在/路上/xx	路上	7	3	1	16	1.63148	0	1	noun	0.666667	109	小雪/很/孝顺，/经常/会/做饭/给/父母/xx	父母	8	3	1	9	1.71569	0.266667	1	noun	0.733333		吃	品	小欢乘坐飞机。	wrong
109	Before getting on the train, Xiao Huan bought snacks to xx on the road.	road										109	Xiao Xue is very dutiful, and often cooks food for her parents to xx.	parents											eat	taste	Xiao Huan took a flight.	wrong
110	这种/新型/电锯/能够/轻而/易举地/把/一根/钢管/xx	钢管	9	1	0	23	0.316224	0	1	noun	0.866667	110	小华/自行车/钥匙/丢了，/只好/让人/用/电锯/把/链条/xx	链条	10	4	1	19	0.242806	0	1	noun	0.4		锯断	切开
110	This new type of saw can easily xx through a steel pipe.	steel pipe										110	Xiao Hua lost his bicycle key, so he had to use a saw to xx the chain.	chain											cut	cut
111	小丽/擦/桌子的/时候/不小心/把/花瓶/xx	花瓶	7	2	1	17	0.314887	0.0666667	1	noun	0.8	111	几个/男生/玩/弹弓的/时候/把/窗户上的/玻璃/xx	玻璃	8	2	1	23	1.5205	0.866667	1	noun	0.666667		碎了	碰掉了
111	When Xiao Li was wiping the table he accidentally xx the vase.	vase										111	When a few boys were playing with slingshots, the glass in the windows was xx.	glass											break	fall off
112	这只/东北虎/被/关在/铁笼子/供人/xx	供人	6	2	1	10	2.71037	0.2	0	prop	0.666667	112	这个/植物园的/樱花/引来/很多/市民/前来/xx	前来	7	1	1	16	1.35185	0.133333	1	verb	0.8		观赏	鉴赏
112	The tiger was kept in iron cages for people to xx.	for people to										112	The cherry blossoms in this botanical garden attract many people who come to xx them.	come to											see	appreciate
113	李婶/干活/任劳/任怨，/从来/不会/对/任何人/xx	任何人	8	2	1	15	0	0	1	noun	0.666667	113	小李/认为/自己/干活多/挣钱少，/所以/经常/跟/朋友们/xx	朋友们	9	3	1	17	1.07569	0	1	noun	0.733333		抱怨	唠叨
113	Li Shen works hard, and never xx to anyone.	anyone										113	Xiao Li thinks he works more than he earns, so he often xx to his friends.	friends											complain	nag
114	他/买来/油漆，/对/墙壁/重新/进行了/xx	进行了	7	2	1	15	2.72187	0.0666667	1	verb	0.733333	114	为了/使/建筑物/颜色/协调/一致，/小区/物业/对/墙面/进行了/重新/xx	重新	12	3	1	22	1.81515	0.0666667	1	adverb	0.666667		粉刷	涂刷
114	He bought paint and then re-xx the wall.	done										114	In order to make the building color coordinated, the walls of the residential property were re-xx.	again											paint	paint
115	看到/前面/交警/在/查酒驾，/喝了酒的/司机/赶紧/弃车/xx	弃车	9	2	1	11	-0.72174	0.0666667	1	verb	0.733333	115	老鼠/看到/猫/以后/不顾/一切地/准备/xx	准备	7	2	1	18	2.09608	0	1	verb	0.666667		逃跑	奔跑
115	Seeing the traffic police in front looking for drunk drivers, the drunk driver quickly abandoned the car and xx.	abandoned the car										115	After seeing the cat, the mouse desperately prepared to xx.	prepare to											run away	run fast
116	终于/看到/自己的/偶像了，/女生们/都/开始/高声/xx	高声	8	2	1	17	0.829222	0	1	adverb	0.6	116	过山车/向下/俯冲时,/所有的/人/都/忍不住/开始/xx	开始	8	2	1	12	2.46759	0	1	verb	0.8		尖叫	喊叫
116	When they finally saw their idol, the girls began xx loudly.	loudly										116	When the roller coaster went downward, everyone could not help but start xx.	start to											scream	shout
117	老张/等得/有点/不耐烦，/食指/在/桌子上/不停地/xx	不停地	8	3	1	21	1.28046	0.0666667	1	adverb	0.666667	117	为了/把/钉子/钉到/木板/里面，/老王/拿起/锤子/开始/用力地/xx	用力地	11	3	1	13	0.978874	0	1	adverb	0.333333		敲打	捶打
117	Lao Zhang waited impatiently, xx his index finger nonstop on the table.	nonstop										117	In order to nail the nails inside the board, Lao Wang picked up the hammer and began to xx it hard.	hard											hit/tap	beat
118	喝醉酒的/大汉/走路/很摇晃，/看起来/很可能/会/xx	会	7	2	1	6	3.52131	0.133333	0	functional	0.8	118	这条路/坑坑/洼洼，/夜间/行走/很容易/xx	很容易	6	2	1	27	1.90249	0.0666667	1	adverb	0.533333		摔倒	跌跤
118	The drunk man walking very unsteadily looks like he is likey to xx.	will										118	This road has many potholes, so it is very easy to xx when walking at night.	easily											fall	fall
119	小万/夫妇/贷款/买了/新房，/主要/是因为/租房住/很不/稳定，/经常/需要/xx	需要	12	3	1	23	2.40333	0.133333	1	verb	0.6	119	因为/新工作/地点/离/原来/住的/地方/比较远，/所以/小青/不得不/再次/xx	再次	12	2	1	12	1.63685	0	1	adverb	0.733333		搬家	迁徙
119	The couple took out a loan to buy a new house, mainly because renting is very unstable, often casuing them to xx.	need										119	Because the location of his new workplace is so far from where he was living, Xiaoqing had to xx again.	again											move	migrate
120	这位/老师傅/拿起/刻刀/对/印章/进行了/细致地/xx	细致地	8	3	1	24	0.979165	0	1	adverb	0.933333	120	老王/正在/专心/致志地/用/刻刀/在/大理石上/xx	大理石上	8	3	1	22	0.628462	0	0	prop	0.466667		雕刻	刻画
120	The old master picked up the knife to carefully xx the seal.	carefully										120	Lao Wang concentrates on using the knife to xx in marble.	on the marble											carve	depict

## Sheet: subset
Subset of between-pairs that have the same SFW-1 (31 pairs), but constraining for different SFWs
ID	Context 1	SFW-1	expected_SFW	context_length	Nr_clauses	dependency	Nr_strokes	freq (LOGW)	cloze_SFW-1	syn_class	syn_class	cloze_SFW	ID	Context 2	SFW-1	expected_SFW	context_length	Nr_clauses	dependency	Nr_strokes	freq (LOGW)	cloze_SFW-1	syn_class	syn_class	cloze_SFW
2	起床后，/为了/能够/更好/采光，/他/立刻/拉开了/厚重的/xx	厚重的	窗帘	9	3	1	26	0.305601	0	1	adj	1	41	为了/保暖，/中国人/经常/会在/被褥/里面/填充/厚厚的/xx	厚厚的	棉花	9	3	1	26	0.565111	0	1	adj	0.933333
2	After getting up, in order to have better lighting, he immediately opened the thick xx.	thick	curtain										41	In order to keep warm, Chinese people often fill their bed sheets with thick xx.	thick	cotton
12	婚礼上的/主角/当然/是/新郎/和/xx	和	新娘	6	1	0	8	3.67478	0.733333	0	functional	1	42	菜市场上/可以/买到/很多/新鲜的/蔬菜/和/xx	和	水果	7	2	1	8	3.67478	0.733333	0	functional	0.933333
12	The most important people at the wedding are of course the groom and xx.	and	bride										42	At the market, you can buy a lot of fresh vegetables and xx.	and	fruit
19	现在/一集/电视剧/中间/不许/插播/太多/xx	太多	广告	7	1	0	10	1.32894	0	1	adj	1	24	现在/很多/地方/都可以/手机/付款，/所以/钱包里/不用/带/太多/xx	太多	现金	11	2	1	10	1.32894	0.0666667	1	adj	0.933333
19	Now an episode of a TV series is not allowed to play too many xx in the middle.	too many	advertisements										24	Nowadays, many places accept mobile phone payment, so there is no need to carry too much xx in your wallet.	too many	cash
24	这里/不能/刷卡，/只能/使用/xx	使用	现金	5	2	1	13	2.39418	0	1	verb	1	8	农村/以前/收割/小麦/主要/使用/xx	使用	镰刀	6	2	1	13	2.39418	0	1	verb	1
24	Credit cards are not accepted here, you can only use xx.	use	cash										8	In the past, people mainly harvested wheat using a xx.	use	sickle
33	毕业生/在/招聘/现场/分发/自己的/xx	自己的	简历	6	2	1	17	2.87618	0.2	0	pronoun	0.866667	44	小希/把/辫子/散开，/认真地/梳理着/自己的/xx	自己的	头发	7	2	1	17	2.87618	0.0666667	0	pronoun	1
33	The graduates at the job fair give out their xx.	own	resume										44	Xiao Xi unravelled her braid, carefully combing her xx.	own	hair
35	张玲/在/供应/乳制品的/农场/看到/很多只/xx	很多只	奶牛	7	2	1	20	0	0	0	classifier	0.866667	43	出国/旅游的/时候，/小谦/拍了/很多张/xx	很多张	照片	6	2	1	22	0	0	1	adj	0.933333
35	At the dairy farm, Zhang Ling saw many xx.	many	cows										43	While he was traveling abroad, Xiao Qian took many xx.	many	photos
41	这些/可以/用来/纺线的/白色/花朵/叫做/xx	叫做	棉花	7	2	1	16	1.29906	0	1	verb	0.866667	23	背上/有/双峰的/动物/叫做/xx	叫做	骆驼	5	2	1	16	1.29906	0.0666667	0	functional	1
41	These white flowers that can be used for spinning are called xx.	called	cotton										23	The animals with two humps are called xx.	called	camels
58	大家/打电话/和/上网/都/离不开/xx	离不开	手机	6	2	1	18	0	0	1	verb	0.733333	28	作为/一个/程序员，/小马/工作/离不开/xx	离不开	电脑	6	2	1	18	0	0	1	verb	0.933333
58	Everyone's telephone and internet access are inseparable in a xx.	a	cell phone(s)										28	As a programmer, Xiao Ma can not do his work without a xx.	a	computer
59	这种/船型的/容易/剥皮的/热带/水果/是/xx	是	香蕉	7	2	1	9	3.90541	0.266667	0	functional	0.733333	17	动物园/里/鼻子/最长的/动物/是/xx	是	大象	6	2	1	9	3.90541	0.866667	0	functional	1
59	The kind of tropical fruit that has a boat shape and is easy to peel is the xx.	the	banana										17	In the zoo, the animal with the longest nose is the xx.	the	elephant
65	小刘的/妈妈/是/画家，/所以/小刘/很早/就/开始/学习/xx	学习	画画	10	3	1	11	2.11872	0.333333	1	verb	0.933333	105	宝宝/走路/之前/会/先在/地上/学习/xx	学习	爬行	7	3	1	11	2.11872	0	1	verb	0.733333
65	Xiao Liu's mother is a painter, so Xiao Liu began learning to xx very early.	learn	draw/paint										105	Before the baby can walk, it learns to xx on the ground.	learn	crawl
66	在/做/重大/手术/之前，/一般/需要/直系/亲属/来/xx	来	签字	10	2	1	7	3.52215	0	0	functional	0.933333	97	小亮/从小/就/喜欢/摆弄/电子/产品，/电脑/坏了/可以/找他/来/xx	来	修理	12	3	1	7	3.52215	0	0	functional	0.8
66	Before a major surgery, it is generally required for immediate family to xx.	obediently	sign										97	Xiao Liang has liked playing with digital products, so if your computer is broken you can ask him to xx it.	obediently	repair
66	在/做/重大/手术/之前，/一般/需要/直系/亲属/来/xx	来	签字	10	2	1	7	3.52215	0	0	functional	0.933333	94	晓曼/从来/不会/素颜/出门，/她/每次/都要/用/半个/小时/来/xx	来	化妆	12	3	1	7	3.52215	0.0666667	0	functional	0.933333
66	Before a major surgery, it is generally required for immediate family to xx.	obediently	sign										94	Xiao Man never goes out without makeup, and she takes half an hour every time to xx.	obediently	put on makeup
68	小马/经常/会/感觉到/手臂上的/脉搏/在/xx	在	跳动	7	2	1	6	3.85281	0.0666667	0	functional	0.933333	81	这一家的/枣糕/非常/有名，/总是/能够/看到/很多人/在/xx	在	排队	9	2	1	6	3.85281	0.2	0	functional	0.8
68	Xiao Ma can often feel the pulse on his arm xx.	always	beat										81	This jujube cake is very famous, so you can always see a lot of people xx for it.	always	line up
68	小马/经常/会/感觉到/手臂上的/脉搏/在/xx	在	跳动	7	2	1	6	3.85281	0.0666667	0	functional	0.933333	89	小瑞/喝水时/被/呛得/一直/在/xx	在	咳嗽	6	2	1	6	3.85281	0	0	functional	0.933333
68	Xiao Ma can often feel the pulse on his arm xx.	always	beat										89	Xiao Rui choked when drinking water and has been xx since.	always	cough
72	一堆/赌徒/正在/非法/棋牌室/进行/xx	进行	赌博	6	2	1	13	2.72187	0.0666667	1	verb	1	78	一位/园丁/正在/用/特制/工具/对/园林里的/植物/进行/xx	进行	修剪	10	2	1	13	2.72187	0.533333	1	verb	0.866667
72	A group of gamblers are xx illegally in the chess room.	doing	gamble										78	A gardener is using special tools to xx the plants in the garden.	doing	trim
72	一堆/赌徒/正在/非法/棋牌室/进行/xx	进行	赌博	6	2	1	13	2.72187	0.0666667	1	verb	1	114	他/买来/油漆，/对/墙壁/重新/进行了/xx	进行了	粉刷	7	2	1	15	2.72187	0.0666667	1	verb	0.733333
72	A group of gamblers are xx illegally in the chess room.	doing	gamble										114	He bought paint and then re-xx the wall.	doing	paint
73	神枪手/瞄准了/目标，/准备/开始/xx	开始	射击	5	2	1	12	2.46759	0	1	verb	1	85	宝宝/喝完/奶/以后，/终于/开始/xx	开始	睡觉	6	2	1	12	2.46759	0	1	verb	0.8
73	The sharpshooter aimed at the target, getting ready to start xx.	start	shoot										85	After drinking milk, the baby finally began to xx.	start	sleep
73	狙击手/隐藏在/制高点，/瞄准/目标/准备/xx	准备	射击	6	3	1	18	2.09608	0.266667	1	verb	0.866667	115	老鼠/看到/猫/以后/不顾/一切地/准备/xx	准备	逃跑	7	2	1	18	2.09608	0	1	verb	0.666667
73	The sniper hid at the highest point, aiming at the target and preparing to xx.	start	shoot										115	After seeing the cat, the mouse desperately prepared to xx.	start	run away
73	狙击手/隐藏在/制高点，/瞄准/目标/准备/xx	准备	射击	6	3	1	18	2.09608	0.266667	1	verb	0.866667	103	一群/学生/穿好/冰鞋/和/护膝，/全副/武装地/准备/xx	准备	滑冰	9	2	1	18	2.09608	0.266667	1	verb	0.733333
73	The sniper hid at the highest point, aiming at the target and preparing to xx.	start	shoot										103	A group of students wear skates and knee pads, dressed to prepare to xx.	start	skate
74	为了/防止/表皮/营养/流失，/小郭/吃梨时/一般/不会/xx	不会	削皮	9	3	1	10	2.2271	0	0	functional	0.866667	86	小松/是个/诚实的/孩子，/从来/不会/xx	不会	撒谎	6	2	1	10	2.2271	0.0666667	0	functional	0.866667
74	To avoid losing the nutritional value of the pear skin, Xiao Guo generally eats pears without xx them.	will not	peel										86	Xiao Song is an honest child, and never xx.	will not	lie
77	天气/很好，/一对/情侣/手拉手/在/林荫/路上/xx	路上	散步	8	4	1	16	1.63148	0.0666667	1	noun	0.933333	109	小欢/上火车/之前/买了/零食/准备在/路上/xx	路上	吃	7	3	1	16	1.63148	0	1	noun	0.666667
77	The weather is very nice, so a couple xx hand in hand on the shady road.	road	take a walk										109	Before getting on the train, Xiao Huan bought snacks to xx on the road.	road	eat
78	一位/园丁/正在/用/特制/工具/对/园林里的/植物/进行/xx	进行	修剪	10	2	1	13	2.72187	0.533333	1	verb	0.866667	114	他/买来/油漆，/对/墙壁/重新/进行了/xx	进行了	粉刷	7	2	1	15	2.72187	0.0666667	1	verb	0.733333
78	A gardener is using special tools to xx the plants in the garden.	doing	trim										114	He bought paint and then re-xx the wall.	doing	paint
78	为了/让/树木/看起来/更有型，/养护/人员/会/定期/对/枝叶/进行/xx	进行	修剪	12	3	1	13	2.72187	0.6	1	verb	0.933333	102	这辆/车/损毁/严重，/主要/是因为/和/高速路/护栏/进行了/xx	进行了	碰撞	10	3	1	15	2.72187	0	1	verb	0.733333
78	In order to make the trees have a better shape, the caretakers regularly xx the branches and leaves.	doing	trim										102	The car was damaged, mainly due to it xx at a high speed with the highway fence.	doing	collide
79	夏天/一到，/小韩/就/经常/跳到/河里/去/xx	去	游泳	8	3	1	5	3.14665	0	0	functional	0.866667	80	因为/口渴，/小周/半夜/起来/去/xx	去	喝水	6	3	1	5	3.14665	0	0	functional	0.8
79	Once summer comes, Xiao Han often jumps into the river to xx.	to	swim										80	Because he was thirsty, Xiao Zhou got up in the middle of the night to xx.	to	drink water
81	这一家的/枣糕/非常/有名，/总是/能够/看到/很多人/在/xx	在	排队	9	2	1	6	3.85281	0.2	0	functional	0.8	89	小瑞/喝水时/被/呛得/一直/在/xx	在	咳嗽	6	2	1	6	3.85281	0	0	functional	0.933333
81	This jujube cake is very famous, so you can always see a lot of people xx for it.	particle (meaning ongoing)	line up										89	Xiao Rui choked when drinking water and has been xx since.	particle (meaning ongoing)	cough
82	为了/保持/口腔/清洁，/人们/每天/用/牙刷/来/xx	来	刷牙	9	3	1	7	3.52215	0	0	functional	0.8	97	家里的/热水器/不/工作了，/妈妈/只好/找/物业的/人/来/xx	来	修理	10	2	1	7	3.52215	0.466667	0	functional	0.8
82	In order to keep their mouths clean, people xx their teeth with a toothrbush everyday.	to	brush										97	The home water heater isn't working, so Mom has to find someone in the building to xx it.	to	repair
90	老鹰/在/空中/不停地/xx	不停地	盘旋	4	2	1	21	1.28046	0	1	adverb	0.8	117	老张/等得/有点/不耐烦，/食指/在/桌子上/不停地/xx	不停地	敲打	8	3	1	21	1.28046	0.0666667	1	adverb	0.666667
90	The eagle kept xx in the air.	nonstop	circle										117	Lao Zhang waited impatiently, xx his index finger nonstop on the table.	nonstop	hit/tap
97	小亮/从小/就/喜欢/摆弄/电子/产品，/电脑/坏了/可以/找他/来/xx	来	修理	12	3	1	7	3.52215	0	0	functional	0.8	94	晓曼/从来/不会/素颜/出门，/她/每次/都要/用/半个/小时/来/xx	来	化妆	12	3	1	7	3.52215	0.0666667	0	functional	0.933333
97	Xiao Liang liked playing with digital products, so if your computer is broken you can ask him to xx it.	to	repair										94	Xiao Man never goes out without makeup, and she takes half an hour every time to xx.	to	put on makeup
98	小武/拿出/一颗/口香糖，/放在/嘴里/慢慢/xx	慢慢	咀嚼	7	3	1	28	1.39279	0	1	adverb	0.733333	105	丽丽/看到/一只/海龟/在/沙滩上/慢慢/xx	慢慢	爬行	7	2	1	28	1.39279	0.0666667	1	adverb	0.8
98	Xiao Wu took out a piece of gum and xx it slowly in his mouth.	slowly	chew										105	Lili saw a turtle xx slowly on the beach.	slowly	crawl
115	老鼠/看到/猫/以后/不顾/一切地/准备/xx	准备	逃跑	7	2	1	18	2.09608	0	1	verb	0.666667	103	一群/学生/穿好/冰鞋/和/护膝，/全副/武装地/准备/xx	准备	滑冰	9	2	1	18	2.09608	0.266667	1	verb	0.733333
115	After seeing the cat, the mouse desperately prepared to xx.	prepare to	run away										103	A group of students wear skates and knee pads, dressed to prepare to xx.	prepare to	skate
117	为了/把/钉子/钉到/木板/里面，/老王/拿起/锤子/开始/用力地/xx	用力地	敲打	11	3	1	13	0.978874	0	1	adverb	0.333333	70	看到/儿子的/精彩/表演后，/妈妈/开始/用力地/xx	用力地	鼓掌	7	2	1	13	0.978874	0	1	adverb	0.933333
117	In order to nail the nails inside the board, Lao Wang picked up the hammer and began to xx it hard.	hard	hit/tap										70	After seeing her son's wonderful performance, the mother began to xx loudly.	hard	applaud
Subset of within-pairs that matched with the subset of between-pairs (48 pairs): difering in SFW-1 and constraining for the same SFW
ID	Context 1	SFW-1	expected_SFW	sen_length	Nr_clauses	dependency	stroke	freq (LOGW)	cloze_SFW-1	syn_class	syn_class	cloze_SFW	ID	Context 2	SFW-1	expected_SFW	sen_length	Nr_clauses	dependency	stroke	freq (LOGW)	cloze_SFW-1	syn_class	syn_class	cloze_SFW
2	起床后，/为了/能够/更好/采光，/他/立刻/拉开了/厚重的/xx	厚重的	窗帘	9	3	1	26	0.305601	0	1	adj	1	2	人们/晚上/睡觉的/时候/一般/都会/拉上/卧室的/xx	卧室的	窗帘	8	2	1	25	0.98284	0	1	adj	1
2	After getting up, in order to have better lighting, he immediately opened the thick xx.	thick	curtain										2	When sleeping at night, people will generally close the xx of the bedroom.	bedroon	curtain
8	为了/上山/割草，/爷爷/磨好了/xx	磨好了	镰刀	5	2	1	24	-0.11968	0	1	verb	1	8	农村/以前/收割/小麦/主要/使用/xx	使用	镰刀	6	2	1	13	2.39418	0	1	verb	1
8	In order to cut the grass on the mountain, Grandfather sharpened the xx.	sharpen	sickle										8	In the past, people mainly harvested wheat using a xx.	use	sickle
12	婚礼上的/主角/当然/是/新郎/和/xx	和	新娘	6	1	0	8	3.67478	0.733333	0	functional	1	12	结婚/仪式上，/新郎/深情地/看着/美丽的/xx	美丽的	新娘	6	2	1	24	1.54042	0	1	adj	1
12	The most important people at the wedding are of course the groom and xx.	and	bride										12	At the wedding ceremony, the groom looked affectionately at the xx.	beautiful	bride
17	河边/有几只/正在/用/鼻子/喷水的/xx	喷水的	大象	6	3	1	24	0.232503	0.0666667	1	adj	0.933333	17	动物园/里/鼻子/最长的/动物/是/xx	是	大象	6	2	1	9	3.90541	0.866667	0	functional	1
17	On the riverbanks, there are a few xx who are using their trunks to spray water.	spraying	elephant										17	In the zoo, the animal with the longest nose is the xx.	is	elephant
19	现在/一集/电视剧/中间/不许/插播/太多/xx	太多	广告	7	1	0	10	1.32894	0	1	adj	1	19	很多人/都/不喜欢/脑白金/在/电视上/做的/xx	做的	广告	7	2	1	19	2.79217	0.133333	1	verb	0.933333
19	Now an episode of a TV series is not allowed play too many xx in the middle.	too many	advertisements										19	Many people do not like it when Naobaijin (a lousy Chinese advertisement) is in TV xx.	make	advertisements
23	在/沙漠中，/经常/会看到/驮运/货物的/xx	货物的	骆驼	6	2	1	24	1.37028	0.4	1	noun	0.933333	23	背上/有/双峰的/动物/叫做/xx	叫做	骆驼	5	2	1	16	1.29906	0.0666667	0	functional	1
23	In the desert, one often sees goods being transported by xx.	goods	camels										23	The animals with two humps are called xx.	is	camels
24	现在/很多/地方/都可以/手机/付款，/所以/钱包里/不用/带/太多/xx	太多	现金	11	2	1	10	1.32894	0.0666667	1	adj	0.933333	24	这里/不能/刷卡，/只能/使用/xx	使用	现金	5	2	1	13	2.39418	0	1	verb	1
24	Nowadays, many places accept mobile phone payment, so there is no need to carry too much xx in your wallet.	much	cash										24	Credit cards are not accepted here, you can only use xx.	use	cash
28	为了/办公/方便，/小赵/买了/一台/手提/xx	手提	电脑	7	2	1	16	0.660707	0	1	adj	0.933333	28	作为/一个/程序员，/小马/工作/离不开/xx	离不开	电脑	6	2	1	18	0	0	1	verb	0.933333
28	For convenience in the office, Xiao Zhao bought a portable xx.	portable	computer										28	As a programmer, Xiao Ma can not do his work without xx.	leave without	computer
33	毕业生/在/招聘/现场/分发/自己的/xx	自己的	简历	6	2	1	17	2.87618	0.2	0	pronoun	0.866667	33	为了/找工作，/小文/一直/在/准备/个人/xx	个人	简历	7	3	1	5	2.51451	0.0666667	1	adj	1
33	The graduates at the job fair give out their xx.	own	resume										33	In order to look for a job, Xiao Wen has all along been preparing her personal xx.	personal	resume
35	张玲/在/供应/乳制品的/农场/看到/很多只/xx	很多只	奶牛	7	2	1	20	0	0	0	classifier	0.866667	35	这个/牧场/养殖着/很多/产乳量/很高的/xx	很高的	奶牛	6	2	1	27	1.6692	0.266667	1	adj	1
35	At the dairy farm, Zhang Ling saw many xx.	many	cows										35	This farm has many xx that produce a lot of milk.	a lot of	cows
41	为了/保暖，/中国人/经常/会在/被褥/里面/填充/厚厚的/xx	厚厚的	棉花	9	3	1	26	0.565111	0	1	adj	0.933333	41	这些/可以/用来/纺线的/白色/花朵/叫做/xx	叫做	棉花	7	2	1	16	1.29906	0	1	verb	0.866667
41	In order to keep warm, Chinese people often fill their bed sheets with thick xx.	thick	cotton										41	These white flowers that can be used for spinning are called xx.	is called	cotton
42	菜市场上/可以/买到/很多/新鲜的/蔬菜/和/xx	和	水果	7	2	1	8	3.67478	0.733333	0	functional	0.933333	42	这个/卖/鲜榨/果汁的/小店/每天/早上/都去/果蔬/市场/批发/很多/xx	很多	水果	12	4	1	15	1.99211	0	1	adj	0.866667
42	At the market, you can buy a lot of fresh vegetables and xx.	and	fruit										42	This store sells fresh juice, and it wholesales lots of xx from the vegetable and fruit markets.	many	fruit
43	出国/旅游的/时候，/小谦/拍了/很多张/xx	很多张	照片	6	2	1	22	0	0	1	adj	0.933333	43	申请/护照的/时候，/需要/拍摄/一张/正面/免冠/xx	免冠	照片	8	2	1	16	-0.479846	0.266667	1	adj	0.866667
43	While he was traveling abroad, Xiao Qian took many xx.	many	photo										43	When applying for a passport, you need to take a xx without wearing a hat.	without wearing a hot	photo
44	小希/把/辫子/散开，/认真地/梳理着/自己的/xx	自己的	头发	7	2	1	17	2.87618	0.0666667	0	pronoun	1	44	刚刚/剃光头的/男孩/很怀念/自己/曾经/浓密的/xx	浓密的	头发	7	1	1	28	0.156057	0	1	adj	0.8
44	Xiao Xi unravelled her braid, carefully combing her xx.	own	hair										44	The boy who just shaved his head misses his thick xx.	thick	hair
58	玲玲/到/三星/专卖店/买了/一部/xx	一部	手机	6	2	1	11	1.89069	0.2	0	classifier	0.933333	58	大家/打电话/和/上网/都/离不开/xx	离不开	手机	6	2	1	18	0	0	1	verb	0.733333
58	Lingling went to the Samsung store and bought a xx.	a	cell phone(s)										58	Everyone's telephone and internet access are inseparable in a xx.	can not leave	cell phone(s)
59	猴子/非常/喜欢/吃/xx	吃	香蕉	4	1	0	6	2.41171	0.4	1	verb	0.933333	59	这种/船型的/容易/剥皮的/热带/水果/是/xx	是	香蕉	7	2	1	9	3.90541	0.266667	0	functional	0.733333
59	Monkeys really like eating xx	eat	banana										59	The kind of tropical fruit that has a boat shape and is easy to peel is the xx.	is	banana
65	小宋/经常/用/铅笔/在/素描本上/写写/xx	写写	画画	7	2	1	10	0.525415	0	1	verb	1	65	小刘的/妈妈/是/画家，/所以/小刘/很早/就/开始/学习/xx	学习	画画	10	3	1	11	2.11872	0.333333	1	verb	0.933333
65	Xiao Song often uses a pencil to write and xx in his sketchbook.	write	draw/paint										65	Xiao Liu's mother is a painter, so Xiao Liu began learning to xx very early.	learn	draw/paint
66	最后，/小杨/只好/在/离婚/协议书上/乖乖/xx	乖乖	签字	7	2	1	16	0.387835	0	1	adverb	1	66	在/做/重大/手术/之前，/一般/需要/直系/亲属/来/xx	来	签字	10	2	1	7	3.52215	0	0	functional	0.933333
66	At last, Xiao Yang had to obediently xx the divorce agreement.	obediently	sign										66	Before a major surgery, it is generally required for immediate family to xx.	to	sign
68	只要/人/活着，/心脏/就会/一直/xx	一直	跳动	6	2	1	9	2.09487	0.133333	1	adverb	1	68	小马/经常/会/感觉到/手臂上的/脉搏/在/xx	在	跳动	7	2	1	6	3.85281	0.0666667	0	functional	0.933333
68	As long as people are alive, their hearts will always xx.	always	beat										68	Xiao Ma can often feel the pulse on his arm xx.	particle (meaning ongoing)	beat
70	听到/这个/感人的/演讲/以后，/观众们/开始/热烈地/xx	热烈地	鼓掌	8	2	1	26	1.40199	0	1	adverb	0.933333	70	看到/儿子的/精彩/表演后，/妈妈/开始/用力地/xx	用力地	鼓掌	7	2	1	13	0.978874	0	1	adverb	0.933333
70	After hearing this moving speech, the audience began to xx warmly.	warmly	applaud										70	After seeing her son's wonderful performance, the mother began to xx loudly.	loudly	applaud
72	一堆/赌徒/正在/非法/棋牌室/进行/xx	进行	赌博	6	2	1	13	2.72187	0.0666667	1	verb	1	72	虽然/输了/很多钱，/老张/仍然/忍不住/出去/外面/xx	外面	赌博	8	3	1	14	1.34518	0	1	noun	0.866667
72	A group of gamblers are xx illegally in the chess room.	doing	gamble										72	Despite losing a lot of money, Lao Zhang could not help but go out and xx.	outside	gamble
73	神枪手/瞄准了/目标，/准备/开始/xx	开始	射击	5	2	1	12	2.46759	0	1	verb	1	73	狙击手/隐藏在/制高点，/瞄准/目标/准备/xx	准备	射击	6	3	1	18	2.09608	0.266667	1	verb	0.866667
73	The sharpshooter aimed at the target, getting ready to start xx.	start	shoot										73	The sniper hid at the highest point, aiming at the target and preparing to xx.	prepare to	shoot
74	为了/防止/表皮/营养/流失，/小郭/吃梨时/一般/不会/xx	不会	削皮	9	3	1	10	2.2271	0	0	functional	0.866667	74	小梅/认为/果皮/含有/丰富/维生素，/所以/她/吃/苹果/从来/都不/xx	都不	削皮	12	4	1	14	2.50054	0	0	functional	1
74	To avoid losing the nutritional value of the pear skin, Xiao Guo generally eats pears without xx them.	will not	peel										74	Xiao Mei thinks that fruit skin is rich in vitamins, so she never xx apples when she eats them.	never	peel
77	天气/很好，/一对/情侣/手拉手/在/林荫/路上/xx	路上	散步	8	4	1	16	1.63148	0.0666667	1	noun	0.933333	77	晚饭/过后，/老李/经常/和/老伴/一起/去/公园/xx	公园	散步	9	4	1	11	1.37448	0.0666667	1	noun	0.866667
77	The weather is very nice, so a couple xx hand in hand on the shady road.	road	take a walk										77	After dinner, Lao Li often goes to the park with his wife to xx.	park	take a walk
78	一位/园丁/正在/用/特制/工具/对/园林里的/植物/进行/xx	进行	修剪	10	2	1	13	2.72187	0.533333	1	verb	0.866667	78	为了/让/树木/看起来/更有型，/养护/人员/会/定期/对/枝叶/进行/xx	进行	修剪	12	3	1	13	2.72187	0.6	1	verb	0.933333
78	A gardener is using special tools to xx the plants in the garden.	doing	trim										78	In order to make the trees have a better shape, the caretakers regularly xx the branches and leaves.	doing	trim
79	夏天/一到，/小韩/就/经常/跳到/河里/去/xx	去	游泳	8	3	1	5	3.14665	0	0	functional	0.866667	79	天气/一热，/很多人/都/选择/去/泳池/xx	泳池	游泳	7	3	1	14	0.410071	0	1	noun	0.933333
79	Once summer comes, Xiao Han often jumps into the river to xx.	to	swim										79	When the weather is hot, many people choose to go xx in the pool.	pool	swim
80	因为/口渴，/小周/半夜/起来/去/xx	去	喝水	6	3	1	5	3.14665	0	0	functional	0.8	80	为了/给/身体/补充/必要的/水分，/大家/要多/xx	要多	喝水	8	2	1	15	1.42439	0.266667	0	functional	1
80	Because he was thirsty, Xiao Zhou got up in the middle of the night to xx.	to	drink water										80	In order to give your body necessary moisture, everyone should xx a lot.	should	drink water
81	为了/买到/春运/期间的/票，/很多人/从/夜里/就/开始/在/火车站/xx	火车站	排队	12	3	1	18	0.744738	0.2	1	noun	1	81	这一家的/枣糕/非常/有名，/总是/能够/看到/很多人/在/xx	在	排队	9	2	1	6	3.85281	0.2	0	functional	0.8
81	To buy tickets during the Spring Festival, many people began to xx at the train station the night before.	train station	line up										81	This jujube cake is very famous, so you can always see a lot of people xx for it.	particle (meaning ongoing)	line up
82	为了/保持/口腔/清洁，/人们/每天/用/牙刷/来/xx	来	刷牙	9	3	1	7	3.52215	0	0	functional	0.8	82	为了/牙齿/健康，/很多/家长/每天/都给/宝宝/xx	宝宝	刷牙	8	3	1	16	0.759975	0	1	noun	1
82	In order to keep their mouths clean, people xx their teeth with a toothrbush everyday.	to	brush										82	For dental health, many parents xx their babies' teeth everyday.	baby	brush
85	宝宝/喝完/奶/以后，/终于/开始/xx	开始	睡觉	6	2	1	12	2.46759	0	1	verb	0.8	85	听到/呼噜声/后，/小赵/才知道/屋里/有人在/xx	有人在	睡觉	7	3	1	14	0	0.2	0	prop	1
85	After drinking milk, the baby finally began to xx.	begin	sleep										85	After hearing the snoring, Xiao Zhao knew everyone in the house was xx.	someone was	sleep
86	小松/是个/诚实的/孩子，/从来/不会/xx	不会	撒谎	6	2	1	10	2.2271	0.0666667	0	functional	0.866667	86	这个/男人/没有/一句话/是/真的，/经常/在/老婆/面前/xx	面前	撒谎	10	3	1	18	1.74726	0.866667	0	prop	0.866667
86	Xiao Song is an honest child, and never xx.	will not	lie										86	This man does not say anything true, often xx in front of his wife.	in front of	lie
89	小苏/患有/肺结核，/所以/经常/xx	经常	咳嗽	5	2	1	19	1.83975	0.0666667	1	adverb	0.8	89	小瑞/喝水时/被/呛得/一直/在/xx	在	咳嗽	6	2	1	6	3.85281	0	0	functional	0.933333
89	Xiao Su is suffering from tuberculosis, so he often xx.	often	cough										89	Xiao Rui choked when drinking water and has been xx since.	particle (meaning ongoing)	cough
90	老鹰/在/空中/不停地/xx	不停地	盘旋	4	2	1	21	1.28046	0	1	adverb	0.8	90	直升机/一直/在/屋顶/xx	屋顶	盘旋	4	2	1	17	0.877921	0	1	noun	0.933333
90	The eagle kept xx in the air.	nonstop	circle										90	The helicopter has been xx over the roof.	roof	circle
94	京剧/开始前，/小亮/特意/走到/后台/看/演员/xx	演员	化妆	8	3	1	21	1.62064	0.733333	1	noun	0.733333	94	晓曼/从来/不会/素颜/出门，/她/每次/都要/用/半个/小时/来/xx	来	化妆	12	3	1	7	3.52215	0.0666667	0	functional	0.933333
94	Before the Peking opera began, Xiao Liang went backstage to see the actors xx.	actors	put on makeup										94	Xiao Man never goes out without makeup, and she takes half an hour every time to xx.	to	put on makeup
97	家里的/热水器/不/工作了，/妈妈/只好/找/物业的/人/来/xx	来	修理	10	2	1	7	3.52215	0.466667	0	functional	0.8	97	小亮/从小/就/喜欢/摆弄/电子/产品，/电脑/坏了/可以/找他/来/xx	来	修理	12	3	1	7	3.52215	0	0	functional	0.8
97	The home water heater isn't working, so Mom has to find someone in the building to xx it.	to	repair										97	Xiao Liang likes playing with digital products, so if your computer is broken you can ask him to xx it.	to	repair
98	小武/拿出/一颗/口香糖，/放在/嘴里/慢慢/xx	慢慢	咀嚼	7	3	1	28	1.39279	0	1	adverb	0.733333	98	吞咽/之前/最好/对/食物/进行/充分/xx	充分	咀嚼	7	2	1	10	1.95159	0.0666667	1	adverb	0.866667
98	Xiao Wu took out a piece of gum and xx it slowly in his mouth.	slowly	chew										98	It is best to xx food thoroughly before swallowing.	thoroughly	chew
102	为了/产生/高能量，/物理学家/让/两种/粒子/进行/激烈地/xx	激烈地	碰撞	9	2	1	32	1.51101	0	1	adverb	0.8	102	这辆/车/损毁/严重，/主要/是因为/和/高速路/护栏/进行了/xx	进行了	碰撞	10	3	1	15	2.72187	0	1	verb	0.733333
102	In order to produce high energy, the physicists allowed the two particles to xx violently.	violently	collide										102	The car was damaged, mainly due to it xx at a high speed with the highway fence.	make	collide
103	今年/冬天/很冷，/很多/小孩子/都去/湖面上/练习/xx	练习	滑冰	8	3	1	11	1.13011	0	1	verb	0.8	103	一群/学生/穿好/冰鞋/和/护膝，/全副/武装地/准备/xx	准备	滑冰	9	2	1	18	2.09608	0.266667	1	verb	0.733333
103	This winter is very cold, so many children go to the lake to practice xx.	practice	skate										103	A group of students wear skates and knee pads, dressed to prepare to xx.	prepare to	skate
105	丽丽/看到/一只/海龟/在/沙滩上/慢慢/xx	慢慢	爬行	7	2	1	28	1.39279	0.0666667	1	adverb	0.8	105	宝宝/走路/之前/会/先在/地上/学习/xx	学习	爬行	7	3	1	11	2.11872	0	1	verb	0.733333
105	Lili saw a turtle xx slowly on the beach.	slowly	crawl										105	Before the baby can walk, it learns to xx on the ground.	learn	crawl
109	小欢/上火车/之前/买了/零食/准备在/路上/xx	路上	吃	7	3	1	16	1.63148	0	1	noun	0.666667	109	小雪/很/孝顺，/经常/会/做饭/给/父母/xx	父母	吃	8	3	1	9	1.71569	0.266667	1	noun	0.733333
109	Before getting on the train, Xiao Huan bought snacks to xx on the road.	road	eat										109	Xiao Xue is very dutiful, and often cooks food for her parents to xx.	parents	eat
114	他/买来/油漆，/对/墙壁/重新/进行了/xx	进行了	粉刷	7	2	1	15	2.72187	0.0666667	1	verb	0.733333	114	为了/使/建筑物/颜色/协调/一致，/小区/物业/对/墙面/进行了/重新/xx	重新	粉刷	12	3	1	22	1.81515	0.0666667	1	adverb	0.666667
114	He bought paint and then re-xx the wall.	done	paint										114	In order to make the building color coordinated, the walls of the residential property were re-xx.	again	paint
115	看到/前面/交警/在/查酒驾，/喝了酒的/司机/赶紧/弃车/xx	弃车	逃跑	9	2	1	11	-0.72174	0.0666667	1	verb	0.733333	115	老鼠/看到/猫/以后/不顾/一切地/准备/xx	准备	逃跑	7	2	1	18	2.09608	0	1	verb	0.666667
115	Seeing the traffic police in front looking for drunk drivers, the drunk driver quickly abandoned the car and xx.	abandoned the car	run away										115	After seeing the cat, the mouse desperately prepared to xx.	prepare to	run away
117	老张/等得/有点/不耐烦，/食指/在/桌子上/不停地/xx	不停地	敲打	8	3	1	21	1.28046	0.0666667	1	adverb	0.666667	117	为了/把/钉子/钉到/木板/里面，/老王/拿起/锤子/开始/用力地/xx	用力地	敲打	11	3	1	13	0.978874	0	1	adverb	0.333333
117	Lao Zhang waited impatiently, xx his index finger nonstop on the table.	nonstop	hit/tap										117	In order to nail the nails inside the board, Lao Wang picked up the hammer and began to xx it hard.	hard	hit/tap
