# Supplementary figures and images for: Specific lexico-semantic predictions are associated with unique spatial and temporal patterns of neural activity
Source: eLife journal article supplement (doi:10.7554/elife.39061), 2018-12-21

A.

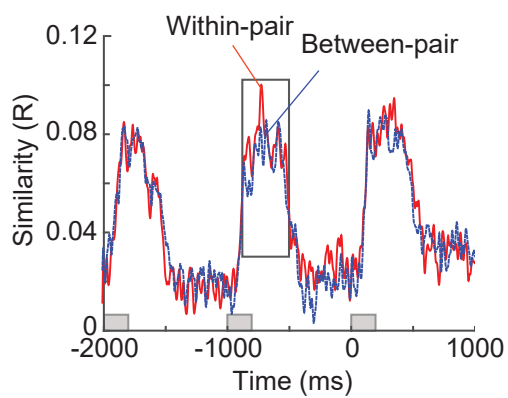

B.

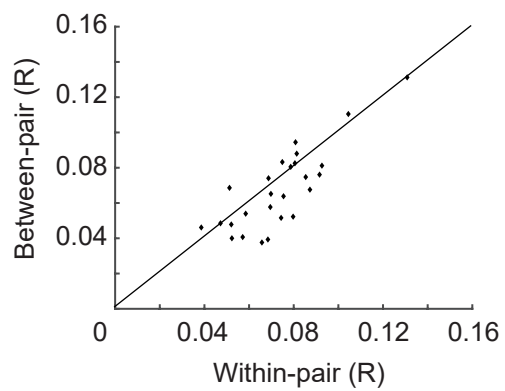

Supplement: supp [file elife_poa_e39061_Figure_2_figure_supplement_1.pdf › elife_poa_e39061_Figure_2_figure_supplement_1.pdf]

A.

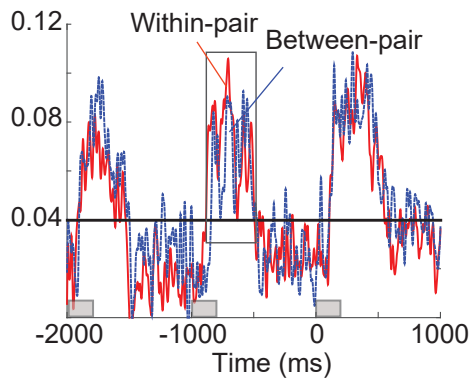

Supplement: supp [file elife_poa_e39061_Figure_2_figure_supplement_2.pdf › elife_poa_e39061_Figure_2_figure_supplement_2.pdf]

A.

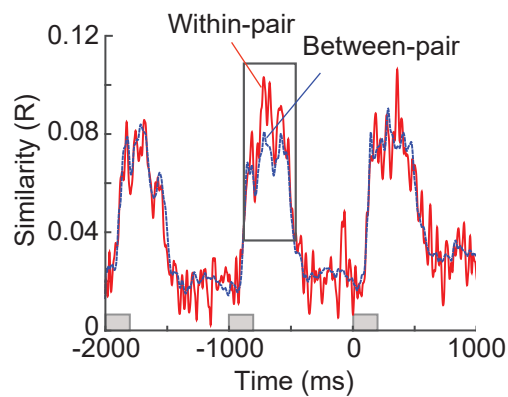

B.

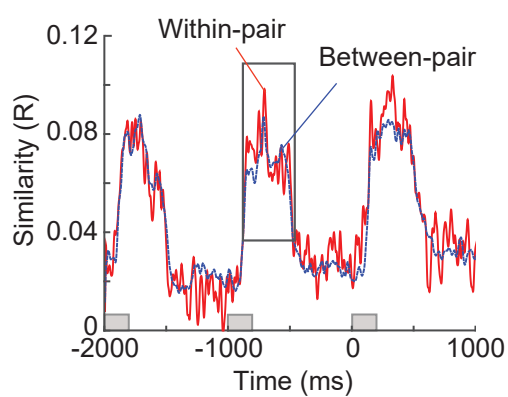

Supplement: supp [file elife_poa_e39061_Figure_2_figure_supplement_3.pdf › elife_poa_e39061_Figure_2_figure_supplement_3.pdf]

A.

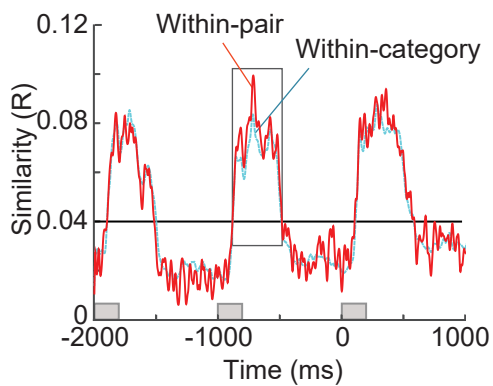

Supplement: supp [file elife_poa_e39061_Figure_2_figure_supplement_4.pdf › elife_poa_e39061_Figure_2_figure_supplement_4.pdf]

A.

Within-pair

Between-pair

Difference

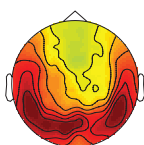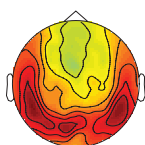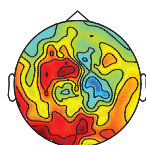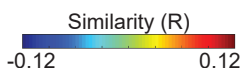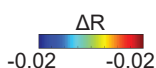

B.

Difference: statistically significant cluster

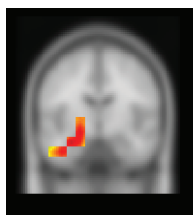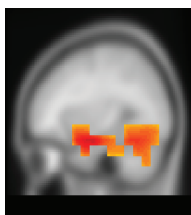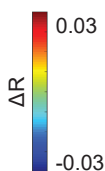

Supplement: supp [file elife_poa_e39061_Figure_3_figure_supplement_1.pdf › elife_poa_e39061_Figure_3_figure_supplement_1.pdf]

A.

N within-pair vs.  $2N \times (N-1)$  between-pair

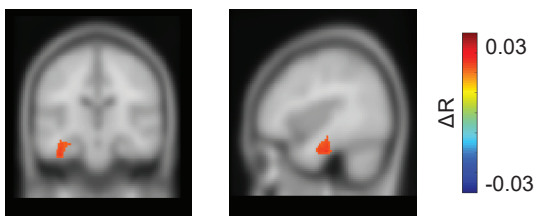

B.

N within-pair vs. N between-pair

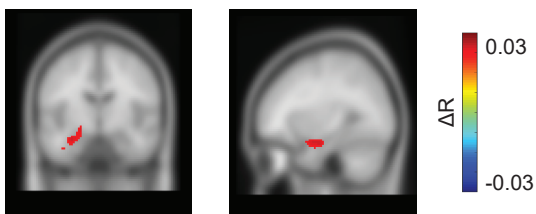

Supplement: supp [file elife_poa_e39061_Figure_3_figure_supplement_2.pdf › elife_poa_e39061_Figure_3_figure_supplement_2.pdf]
